# Supplementary material for: H3K9me1/2 methylation limits the lifespan of daf-2 mutants in C. elegans
Source: eLife. 2022 Sep 20;11:e74812. doi: 10.7554/eLife.74812 (PMC9514849; doi:10.7554/eLife.74812)
Supplement: Supplementary file 1. [file elife-74812-supp1.xlsx]

## Sheet: Sheet1
Supplementary file 1. Statistical analyses of lifespan experiments.																							.
Statistical analyses of lifespan experiments in figure1B
Genotype	n (dead/initial)a	Mean lifespan (days)				std.err.b	Percent changec	Percent changed	p-valuee
		replicate #1	replicate #2	replicate #3	total						a. Total numbers of animals scored
N2	102/150	22.5	22.1	-	22.3	0.3	0	-39.9	-		b. Standard error of the mean lifespan in days
set-21(ok2320)	120/150	22.5	21.4	-	22	0.7	-1.6	-40.9	>0.05f		c. Percent change in mean lifespan compared to N2
set-21(ust68)	112/150	21.8	21.6	-	21.7	0.1	-2.8	-41.6	>0.05f		d. Percent change in mean lifespan compared to daf-2
set-21(ust69)	154/180	20.8	21.4	-	21.1	0.4	-5.5	-43.2	>0.05f		e. P­values were determined by a log rank test. P­values <0.05 are considered significantly different from the control.
set-21(ust104)	124/180	21	20.9	-	21	0	-6.1	-43.6	>0.05f		f. Compared with N2
set-21(ust107)	102/150	20.2	19.4	-	19.9	0.6	-10.9	-46.4	0.0013f		g. Compared with daf-2
daf-2(e1370)	86/150	37.4	36.7	-	37.1	0.5	66.3	0	-
daf-2(e1370);set-21(ok2320)	129/180	50.8	51.3	-	51.1	0.4	128.9	37.6	<0.00001g
daf-2(e1370);set-21(ust68)	134/180	56.8	59	-	57.5	1.5	157.8	55	<0.00001g
daf-2(e1370);set-21(ust69)	153/180	59.1	68.1	-	62.6	6.4	180.6	68.7	<0.00001g
daf-2(e1370);set-21(ust104)	135/180	59.5	68.1	-	62.8	6.1	181.6	69.3	<0.00001g
daf-2(e1370);set-21(ust107)	161/180	57.7	61.6	-	59.1	2.7	164.7	59.1	<0.00001g
Statistical analyses of lifespan experiments in figure1C
Genotype	n (dead/initial)a	Mean lifespan (days)				std.err.b	Percent changec	Percent changed	p-valuee	p-valuef		a. Total numbers of animals scored;
		replicate #1	replicate #2	replicate #3	total							b. Standard error of the mean lifespan in days
N2	146/180	24.4	22.8	-	23.5	1.1	-	-26.5	-	<0.00001		c. Percent change in mean lifespan compared to N2
set-21(ust68)	110/150	22.1	24.3	-	23.5	1.6	0.2	-26.3	>0.05	<0.00001		d. Percent change in mean lifespan compared to eat-2
eat-2(ad465)	84/180	32.7	31.1	-	31.9	1.2	36	-	<0.00001	-		e. Compared with N2
eat-2(ad465);set-21(ust68)	92/180	38.3	35.7	-	37.1	1.8	58	16.1	<0.00001	<0.00001		f. Compared with eat-2
Statistical analyses of lifespan experiments in figure2C
Genotype	n (dead/initial)a	Mean lifespan (days)				std.err.b	Percent changec	p-valued
		replicate #1	replicate #2	replicate #3	total					a. Total numbers of animals scored;
N2	89/120	22.7	21.3	20.7	22.1	1	-	-		b. Standard error of the mean lifespan in days
met-2(n4256)	46/120	18.7	18.9	18.6	18.8	0.2	-14.9	<0.00001		c. Percent change in mean lifespan compared to N2
set-25(n5021)	105/150	24	22.5	22	23.3	1	5.5	0.01		d. Compared with N2
Genotype	n (dead/initial)a	Mean lifespan (days)				std.err.b	Percent changee	p-valuef		e. Percent change in mean lifespan compared to daf-2
		replicate #1	replicate #2	replicate #3	total					f. Compared with daf-2
daf-2(e1370)	124/180	35.3	36.8	37.1	36.6	0.9	-	-
daf-2(e1370);met-2(n4256)	77/270	44	44.1	51.6	48.3	4.4	32.1	<0.00001
daf-2(e1370);set-25(n5021)	83/180	34.2	35.9	37.8	35.9	1.8	-1.7	>0.05
Statistical analyses of lifespan experiments in figure3A
Genotype	n (dead/initial)a	Mean lifespan (days)				std.err.b	Percent changec	p-valued
		replicate #1	replicate #2	replicate #3	total					a. Total numbers of animals scored;
N2	99/180	20.4	21.8	-	21.1	1	-	-		b. Standard error of the mean lifespan in days
set-6(ok2195)	118/180	21.7	23.9	-	22.7	1.6	7.4	1.3e-05		c. Percent change in mean lifespan compared to N2
set-13(ust54)	96/180	20.5	21.7	-	21	0.9	-0.8	>0.05		d. Compared with N2
set-15(ok3291)	42/180	20.5	19.8	-	20	0.5	-5.3	0.039
set-19(ok1813)	128/180	22.5	21.3	-	21.9	0.9	3.8	0.029
set-20(ok2022)	101/180	22.9	22.5	-	22.7	0.3	7.4	7.88766e-05
set-32(ok1457)	96/180	24.8	24.8	-	24.9	0	17.6	<0.00001
set-33(ust114)	95/180	21.4	22.2	-	22	0.5	3.9	0.092
Statistical analyses of lifespan experiments in figure3B
Genotype	n (dead/initial)a	Mean lifespan (days)				std.err.b	Percent changec	p-valued
		replicate #1	replicate #2	replicate #3	total					a. Total numbers of animals scored;
daf-2(e1370)	96/180	36.6	35.1	-	35.9	1.1	-	-		b. Standard error of the mean lifespan in days
daf-2(e1370);set-6(ok2195)	124/180	61.4	61.4	-	61.4	0	71.2	<0.00001		c. Percent change in mean lifespan compared to daf-2
daf-2(e1370);set-13(ust54)	80/120	38.6	36.1	-	37.4	1.8	4.2	>0.05		d. Compared with daf-2
daf-2(e1370);set-15(ok3291)	79/180	34.5	34.8	-	34.6	0.2	-3.4	>0.05
daf-2(e1370);set-19(ok1813)	83/150	54.3	67.7	-	61	9.5	70.1	<0.00001
daf-2(e1370);set-20(ok2022)	126/180	55.3	58.7	-	57	2.4	59	<0.00001
daf-2(e1370);set-32(ok1457)	111/150	53.3	61.6	-	57.4	5.9	60.1	<0.00001
daf-2(e1370);set-33(ust114)	54/120	52.9	56	-	54.4	2.2	51.8	<0.00001
Statistical analyses of lifespan experiments in figure4A
Genotype	n (dead/initial)a	Mean lifespan (days)				std.err.b	Percent changec	p-valued
		replicate #1	replicate #2	replicate #3	total					a. Total numbers of animals scored;
daf-2(e1370)	94/150	36.6	36.8	-	36.6	0.2	-39.5	<0.00001		b. Standard error of the mean lifespan in days
daf-2(e1370);set-21(ust68)	126/180	61.4	59.1	-	60.5	1.6	0	-		c. Percent change in mean lifespan compared to daf-2;set-21
daf-2(e1370);set-21(ust68);set-6(ok2195)	126/180	56.9	64.3	-	60.4	5.2	-0.1	>0.05		d. Compared with daf-2;set-21
daf-2(e1370);set-21(ust68);set-19(ok1813)	84/180	59.8	64.4	-	61.8	3.3	2.1	>0.05
daf-2(e1370);set-21(ust68);set-20(ok2022)	87/180	58.2	58.3	-	58.2	0.1	-3.8	>0.05
daf-2(e1370);set-21(ust68);set-32(ok1457)	147/180	61.9	59.6	-	60.7	1.7	0.3	>0.05
daf-2(e1370);set-21(ust68);set-33(ust114)	128/180	58	62.2	-	59.7	3	-1.3	>0.05
Statistical analyses of lifespan experiments in figure4B
Genotype	n (dead/initial)a	Mean lifespan (days)				std.err.b	Percent changec	p-valued
		replicate #1	replicate #2	replicate #3	total					a. Total numbers of animals scored;
daf-2(e1370)	125/180	36.6	37.4	-	37.1	0.6	0	-		b. Standard error of the mean lifespan in days
daf-2(e1370);hpl-1(tm1624)	124/180	35.7	40	-	38	3	2.3	>0.05		c. Percent change in mean lifespan compared to daf-2
daf-2(e1370);hpl-2(tm1489)	136/180	32.9	32.5	-	32.7	0.3	-12	<0.00001		d. Compared with daf-2
Statistical analyses of lifespan experiments in figure4C
Genotype	n (dead/initial)a	Mean lifespan (days)				std.err.b	Percent changec	Percent changed	Percent changee	p-valuef	p-valueg		a. Total numbers of animals scored;
		replicate #1	replicate #2	replicate #3	total								b. Standard error of the mean lifespan in days
daf-2(e1370)	107/180	34.3	34.3	36.6	35.8	1.3	-	-	-	<0.00001	<0.00001		c. Percent change in mean lifespan compared to daf-2
daf-2(e1370);set-21(ust68)	112/180	61.7	61.7	60	60.9	1	69.9	-	-	-	-		d. Percent change in mean lifespan compared to daf-2;set-21
daf-2(e1370);set-2(ok952)	135/180	55.3	55.3	56.1	55.7	0.5	55.6	-	-	-	-		e. Percent change in mean lifespan compared to daf-2;set-2
daf-2(e1370);set-2(ok952);set-21(ust68)	103/180	56.1	56.1	56.3	56.2	0.1	56.9	-7.7	0.9	>0.05	>0.05		f. Compared with daf-2;set-21
													g. Compared with daf-2;set-2
Statistical analyses of lifespan experiments in figure4D
Genotype	n (dead/initial)a	Mean lifespan (days)				std.err.b	Percent changec	Percent changed	Percent changee	p-valuef	p-valueg		a. Total numbers of animals scored;
		replicate #1	replicate #2	replicate #3	total								b. Standard error of the mean lifespan in days
daf-2(e1370)	123/180	34.9	36.6	-	35.9	1.2	-	-	-	<0.00001	<0.00001		c. Percent change in mean lifespan compared to daf-2
daf-2(e1370);set-21(ust68)	120/180	61.3	60	-	60.7	0.9	69.2	-	-	-	-		d. Percent change in mean lifespan compared to daf-2;set-21
daf-2(e1370);rsks-1(ok1255)	97/540	61.9	53.7	-	58.8	5.8	64.1	-	-	-	-		e. Percent change in mean lifespan compared to daf-2;rsks-1
daf-2(e1370);rsks-1(ok1255);set-21(ust68)	72/540	63.3	62.5	-	63.1	0.6	75.8	3.9	7.2	>0.05	>0.05		f. Compared with daf-2;set-21
													g. Compared with daf-2;rsks-1
Statistical analyses of lifespan experiments in figure5C
Genotype	n (dead/initial)a	Mean lifespan (days)				std.err.b	Percent changec	Percent changed	Percent changee	p-valuef	p-valueg		a. Total numbers of animals scored;
		replicate #1	replicate #2	replicate #3	total								b. Standard error of the mean lifespan in days
daf-2(e1370)	121/180	33.9	36.4	45.3	39.3	6	-	-	-	-	-		c. Percent change in mean lifespan compared to daf-2
daf-2(e1370);daf-16(mu86)	181/270	20.8	24.6	26.5	24.4	2.9	-36.8	-	-	<0.00001	-		d. Percent change in mean lifespan compared to daf-2;daf-16
daf-2(e1370);set-21(ust68)	197/270	45.8	55.2	58.5	53.3	6.6	38.7	-	-	-	-		e. Percent change in mean lifespan compared to daf-2;set-21
daf-2(e1370);daf-16(mu86);set-21(ust68)	149/270	18.8	21.6	24.4	21.9	2.8	-43.7	-10.1	-58.9	<0.00001	<0.00001		f. Compared with daf-2
													g. Compared with daf-2;set-21
Statistical analyses of lifespan experiments in figure5D
Genotype	n (dead/initial)a	Mean lifespan (days)				std.err.b	Percent changec	Percent changed	Percent changee	p-valuef	p-valueg		a. Total numbers of animals scored;
		replicate #1	replicate #2	replicate #3	total								b. Standard error of the mean lifespan in days
N2	138/210	24	22	25.7	23.8	1.9	-	-	-	-	-		c. Percent change in mean lifespan compared to N2
daf-16(mu86)	156/240	20	19.1	21	20.1	1	-16.1	-	-	<0.00001	-		d. Percent change in mean lifespan compared to daf-16
set-21(ust68)	152/240	26.5	22.4	29.3	26.6	3.5	8.8	-	-	-	-		e. Percent change in mean lifespan compared to set-21
daf-16(mu86);set-21(ust68)	123/240	20.8	18.6	22.1	20.6	1.7	-14.2	2.6	-22.6	<0.00001	<0.00001		f. Compared with N2
													g. Compared with et-21
Statistical analyses of lifespan experiments in figure7B
Genotype	n (dead/initial)a	Mean lifespan (days)				std.err.b	Percent changec	Percent changed	Percent changee	p-valuef	p-valueg	p-valueh
		replicate #1	replicate #2	replicate #3	total									a. Total numbers of animals scored;
daf-2(e1370)	189/240	39.6	33.1	34.4	35.6	3.4	0	-42.2	-	-	<0.00001	-		b. Standard error of the mean lifespan in days
daf-2(e1370);set-21(ust68)	190/270	62.6	58.3	64.5	61.5	3.2	72.9	0	-	<0.00001	-	-		c. Percent change in mean lifespan compared to daf-2
daf-2(e1370);lys-7(ok1384)	206/240	34.1	33.1	38.6	34.8	2.9	-2.2	-43.4	-	>0.05	-	-		d. Percent change in mean lifespan compared to daf-2;set-21
daf-2(e1370);spp-12(tm2963)	180/210	54.8	53.1	56.3	54.4	1.6	52.9	-11.6	-	<0.00001	-	-		e. Percent change in mean lifespan compared with daf-2;xxx and daf-2;set-21;xxx
daf-2(e1370);dao-3(ok1678)	74/270	38.9	41.7	40.9	40.7	1.4	14.3	-33.9	-	0.0025	-	-		f. Compared with daf-2.
daf-2(e1370);tts-1(gk105)	264/270	53	55.2	60.5	55.8	3.9	56.9	-9.3	-	<0.00001	-	-		g. Compared with daf-2;set-21.
daf-2(e1370);F35E8.7(ust198)	144/270	52.3	54.2	54.1	53.7	1.1	50.8	-12.8	-	<0.00001	-	-		h. Compared with daf-2;xxx and daf-2;set-21;xxx, for example, daf-2;lys-7 and daf-2;set-21;lys-7
daf-2(e1370);ins-35(ok3297)	189/240	48.4	47.2	48.4	48	0.7	34.8	-22	-	<0.00001	-	-
daf-2(e1370);nhr-62(tm1818)	187/240	36.6	37	37.5	37	0.5	4	-39.8	-	>0.05	-	-
daf-2(e1370);sod-3(tm760)	119/270	47.4	43.2	48.8	46.5	2.9	30.5	-24.5	-	<0.00001	-	-
daf-2(e1370);asm-2(tm3746)	192/270	35.9	35.7	37.4	36.3	0.9	1.8	-41.1	-	>0.05	-	-
daf-2(e1370);Y39G8B.7(ust197)	226/270	37.7	36.2	38.9	37.5	1.3	5.2	-39.2	-	0.029	-	-
daf-2(e1370);set-21(ust68);lys-7(ok1384)	162/240	62	61.5	64	62.4	1.3	75.3	1.4	79.3	-	>0.05	<0.00001
daf-2(e1370);set-21(ust68);spp-12(tm2963)	131/210	62.1	61	61.8	61.5	0.5	72.8	-0.1	13	-	>0.05	<0.00001
daf-2(e1370);set-21(ust68);dao-3(ok1678)	117/270	61.3	55.1	65	61.1	5	71.6	-0.7	50.2	-	>0.05	<0.00001
daf-2(e1370);set-21(ust68);tts-1(gk105)	153/240	56.6	56.7	61.4	58	2.7	63	-5.7	3.9	-	0.042	>0.05
daf-2(e1370);set-21(ust68);F35E8.7(ust198)	172/270	56.3	55.1	59.3	56.9	2.1	59.7	-7.6	5.9	-	0.0063	>0.05
daf-2(e1370);set-21(ust68);ins-35(ok3297)	127/270	57.6	58.3	55.1	56.6	1.7	59.1	-8	18	-	0.0040	<0.00001
daf-2(e1370);set-21(ust68);nhr-62(tm1818)	159/270	52.9	54.9	57.2	55.4	2.2	55.5	-10.1	49.5	-	0.00030	<0.00001
daf-2(e1370);set-21(ust68);sod-3(tm760)	140/270	51.6	53.7	53.3	52.9	1.1	48.7	-14	14	-	<0.00001	<0.00001
daf-2(e1370);set-21(ust68);asm-2(tm3746)	134/240	52	52.8	51.3	52	0.7	46	-15.5	43.4	-	<0.00001	<0.00001
daf-2(e1370);set-21(ust68);Y39G8B.7(ust197)	162/270	47.1	55.3	50.9	51.2	4.1	44	-16.7	36.8	-	<0.00001	<0.00001
Statistical analyses of lifespan experiments in figure8C
Genotype	n (dead/initial)a	Mean lifespan (days)				std.err.b	Percent changec	p-valued
		replicate #1	replicate #2	replicate #3	total					a. Total numbers of animals scored;
daf-2(e1370) without inhibitor	111/180	32.1	31.9	-	32	0.2	-	-		b. Standard error of the mean lifespan in days
daf-2(e1370) + 0.5μM A-366	83/150	35.6	34.9	-	35.3	0.5	10.3	0.0025		c. Percent change in mean lifespan compared to daf-2 without inhibitor
daf-2(e1370) + 2μM A-366	100/180	37.4	36.1	-	36.8	0.9	14.9	<0.00001		d. Compared with daf-2 without inhibitor
daf-2(e1370) + 5μM A-366	86/150	38	35.5	-	36.9	1.8	15.1	<0.00001
daf-2(e1370) + 10μM A-366	97/180	37	34.6	-	35.8	1.7	11.9	0.00023
Statistical analyses of lifespan experiments in figure8-figure supplement4C
Genotype	n (dead/initial)a	Mean lifespan (days)				std.err.b	Percent changec	p-valued		a. Total numbers of animals scored;
		replicate #1	replicate #2	replicate #3	total					b. Standard error of the mean lifespan in days
N2 without inhibitor	163/180	23.8	22.8	-	23.2	0.7	-	-		c. Percent change in mean lifespan compared to N2 without inhibitor
N2 + 5μM A-366	164/180	23.2	23	-	23.1	0.2	-0.6	>0.05		d. Compared with N2 without inhibitor
