# Supplementary figures and images for: H3K9me1/2 methylation limits the lifespan of daf-2 mutants in C. elegans
Source: eLife journal article supplement (doi:10.7554/elife.74812), 2022-09-20

A

|        | embryo |        |        |              |            | soma | germline |         |
|--------|--------|--------|--------|--------------|------------|------|----------|---------|
|        | 2-cell | 4-cell | 8-cell | 200-350-cell | Multi-Cell | soma | Mitosis  | Meiosis |
| SET-13 | -      | -      | +      | +            | -          | -    | -        | -       |
| SET-21 | +      | +      | +      | +            | +          | +    | +/-      | -       |
| SET-25 | +      | +      | +      | +            | +          | -    | +        | +       |
| SET-32 | +      | +      | +      | +            | +          | -    | +        | +       |

B

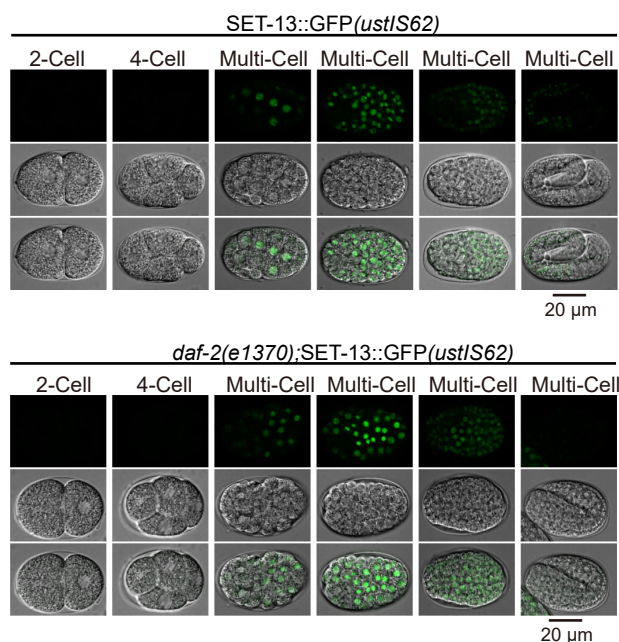

C

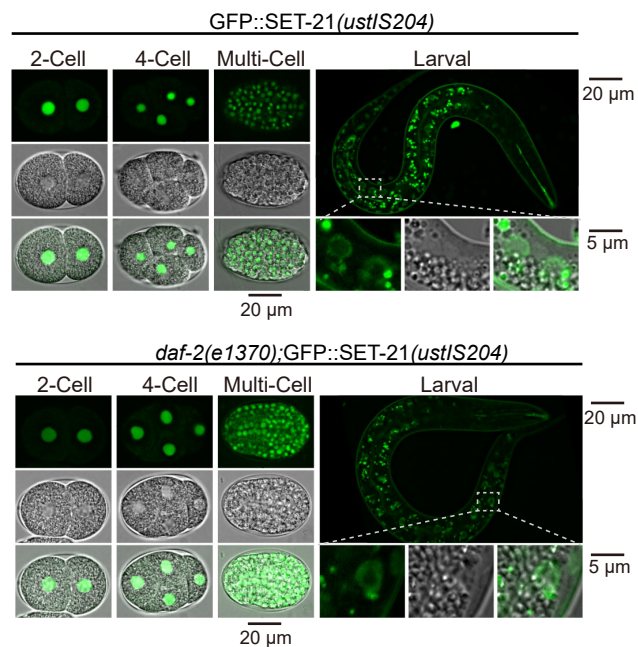

D

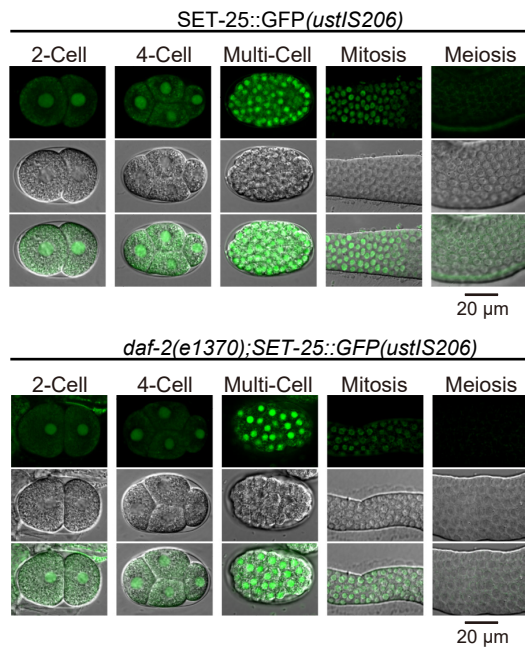

E

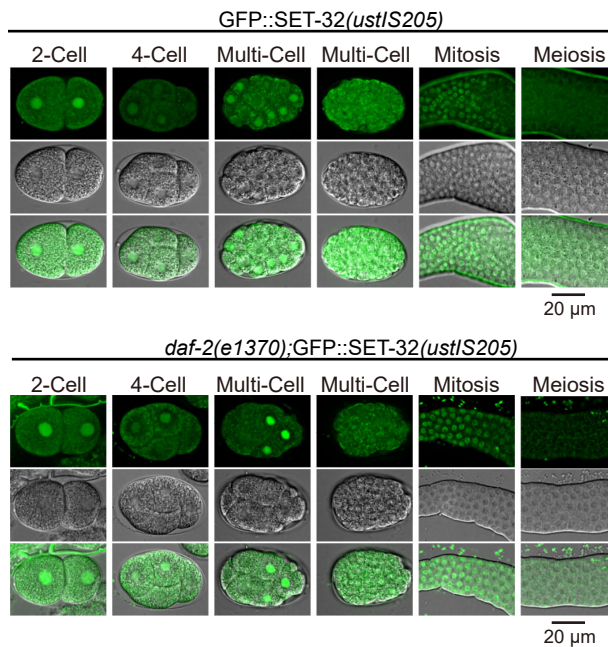

Supplement: supp [file elife-74812-supp-v1.zip]

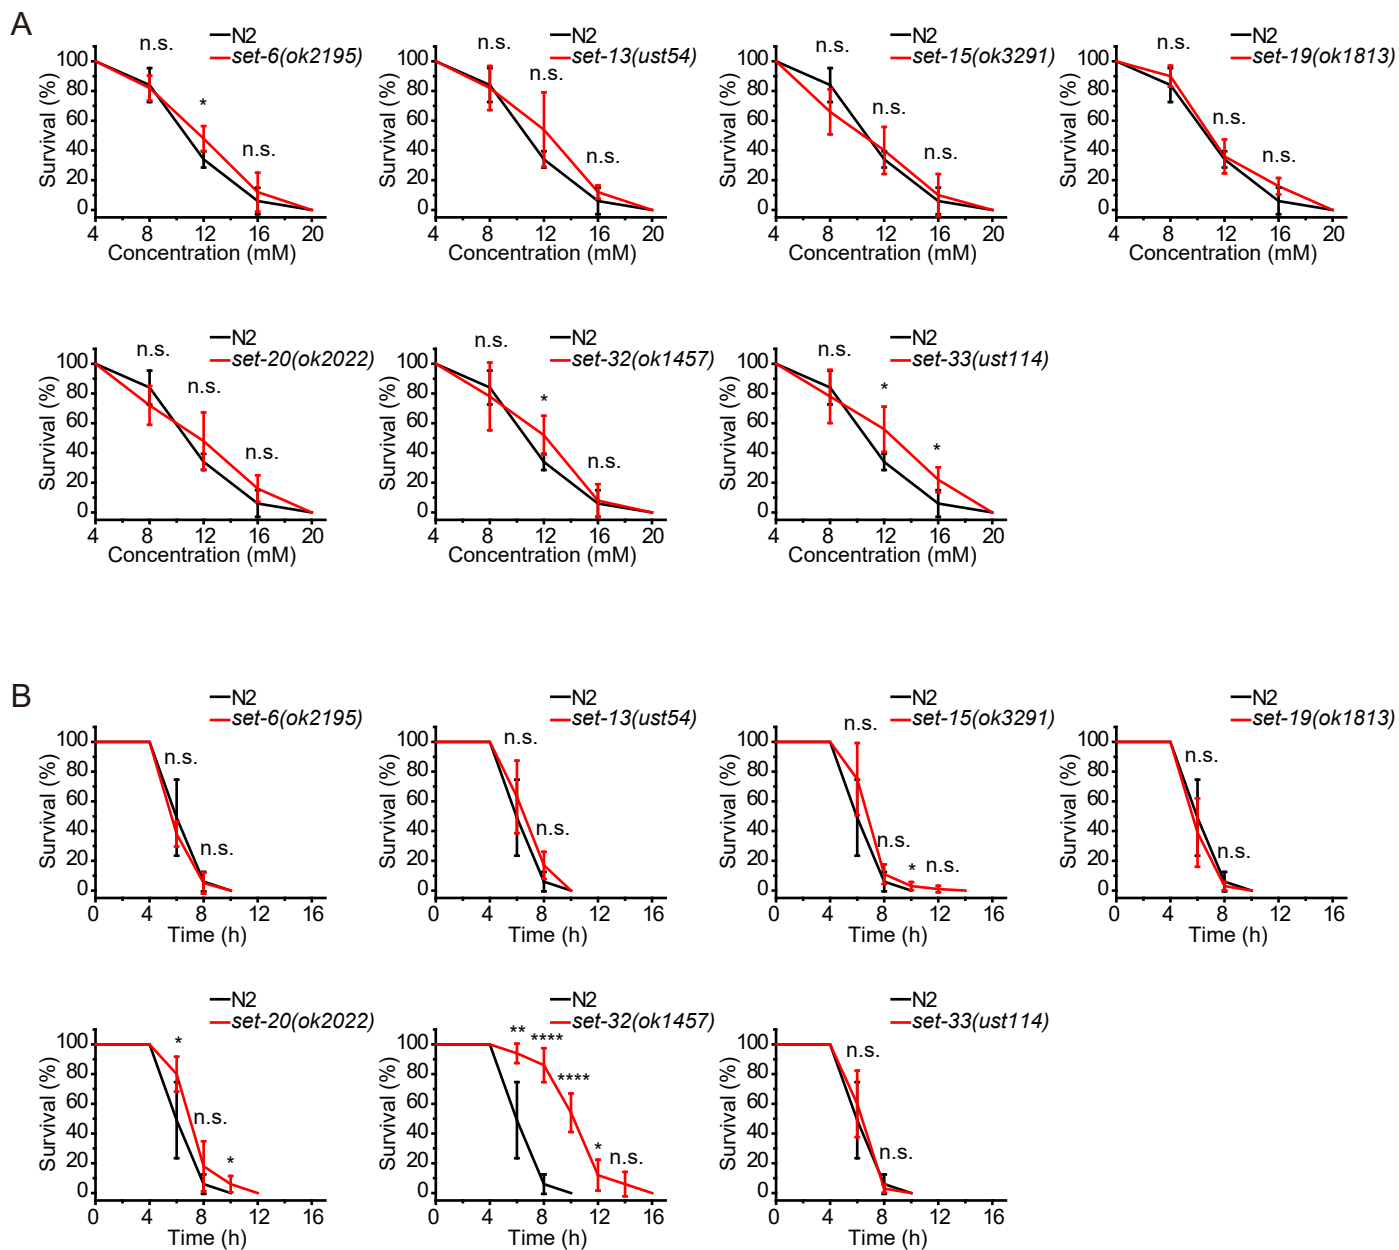

Figure3-S3

Supplement: supp [file elife-74812-supp-v1.zip]

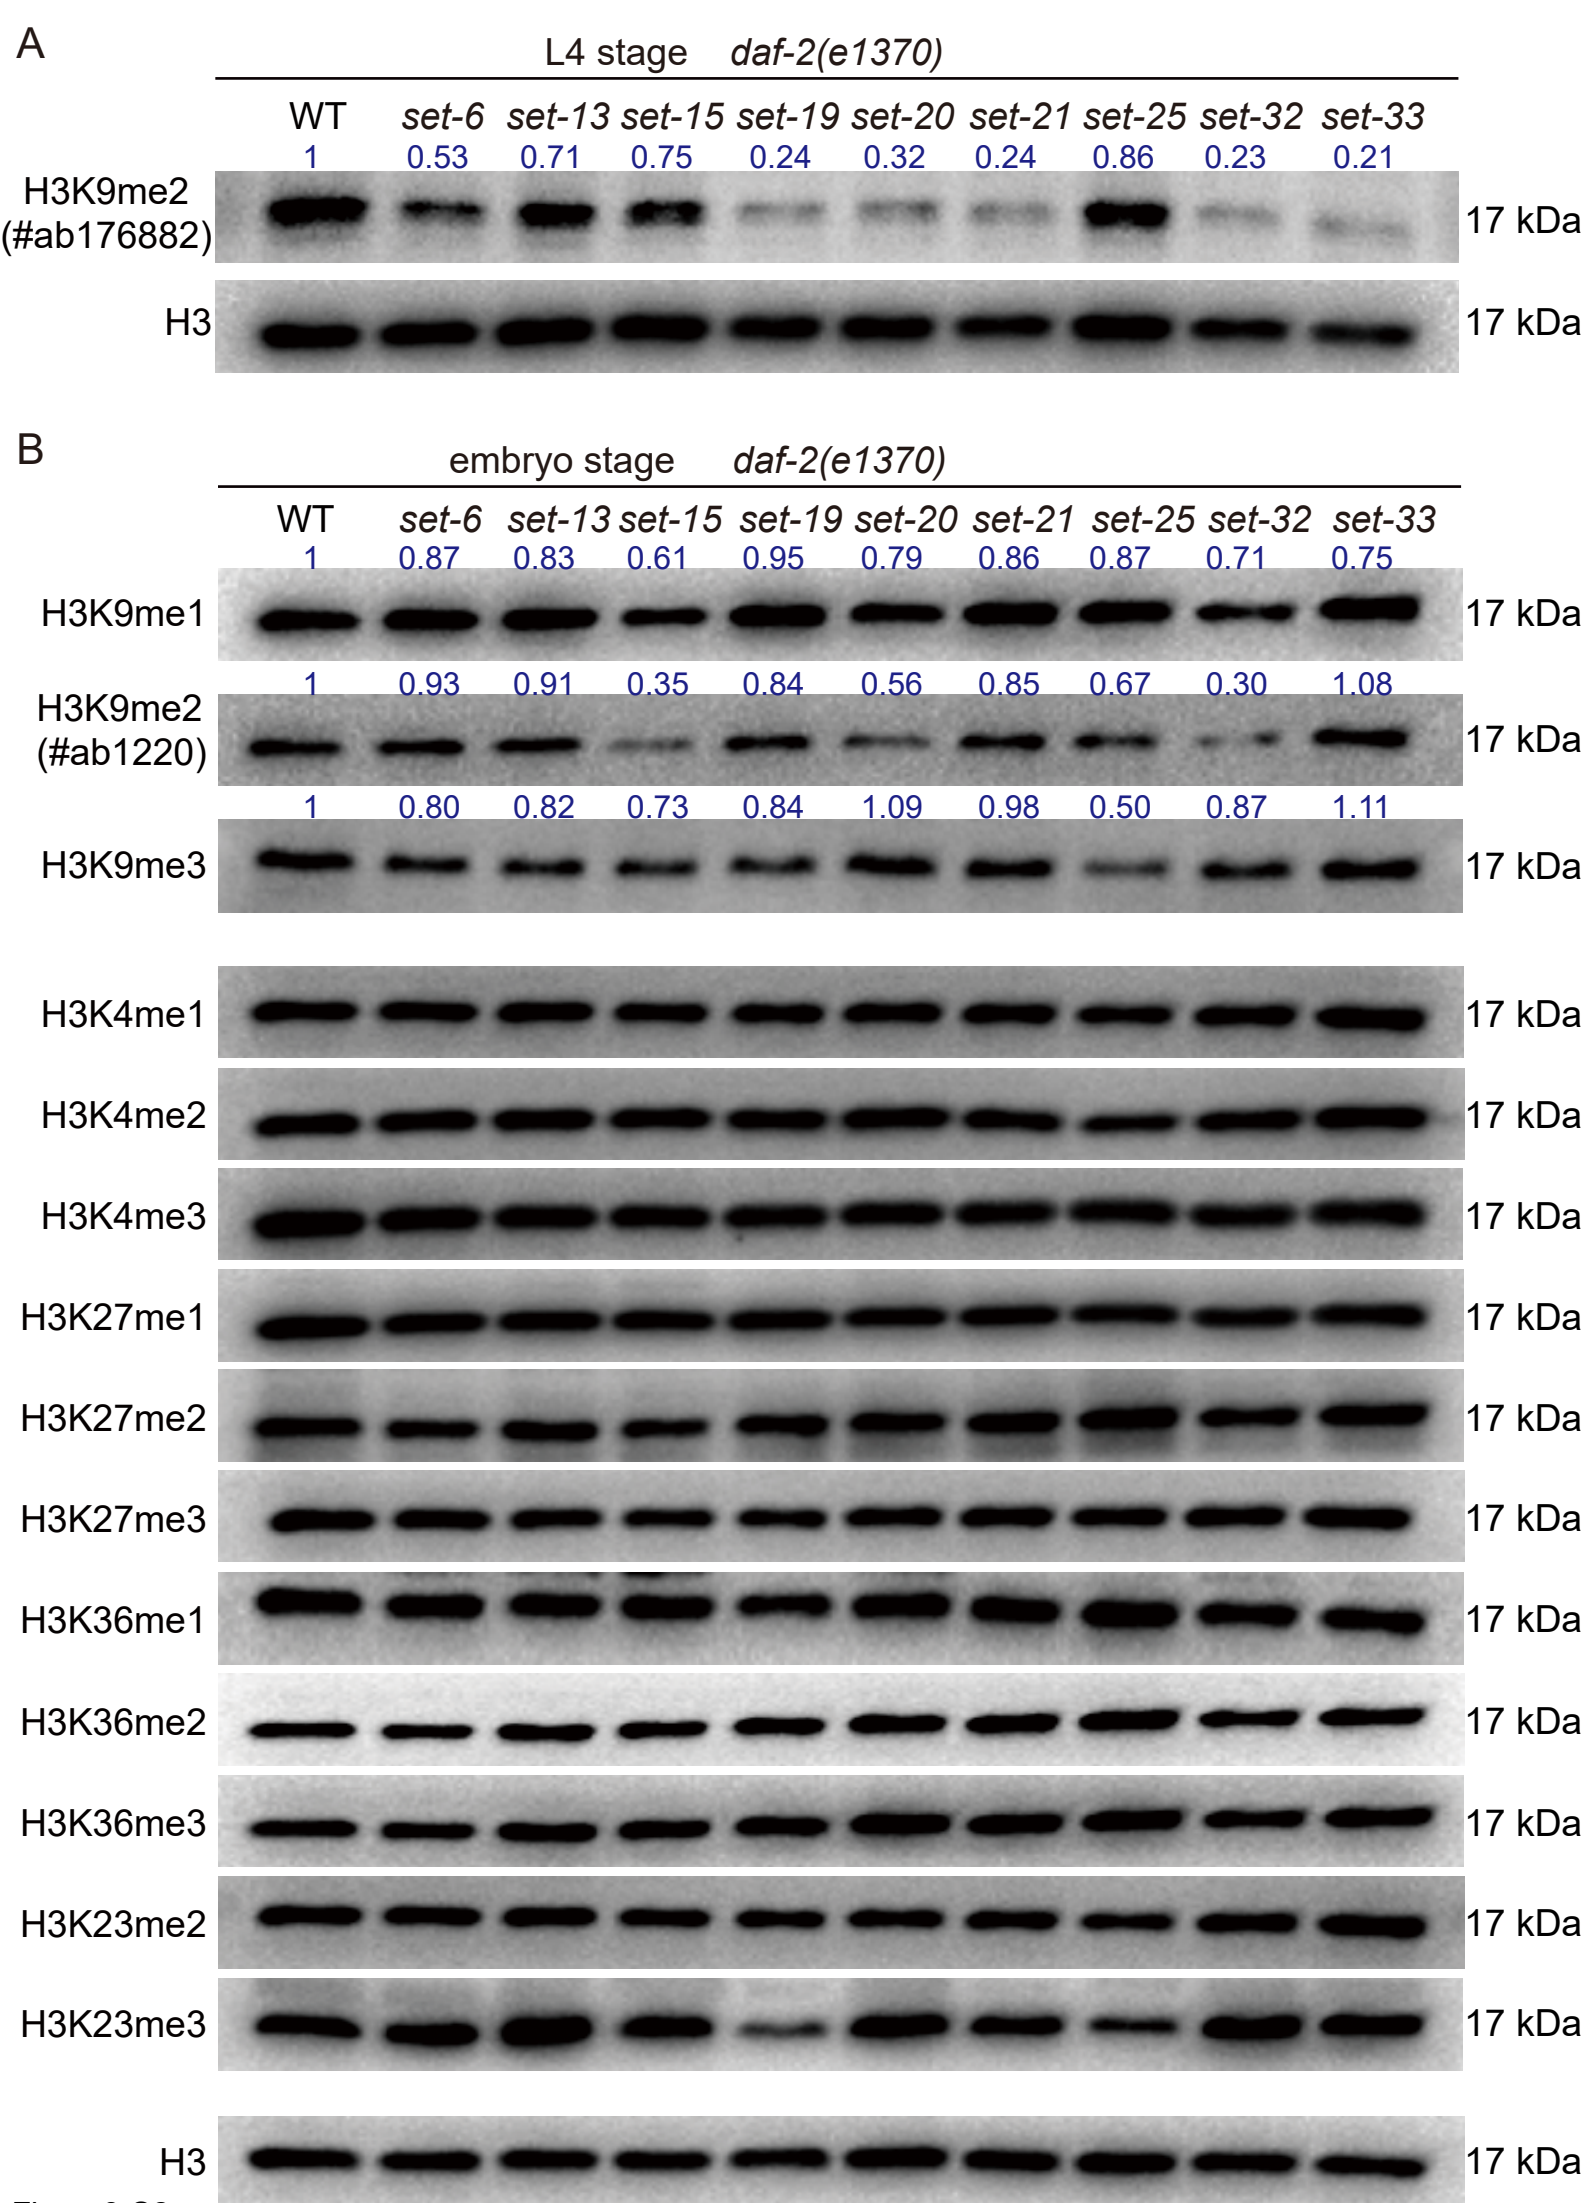

Figure8-S2

Supplement: supp [file elife-74812-supp-v1.zip]

A

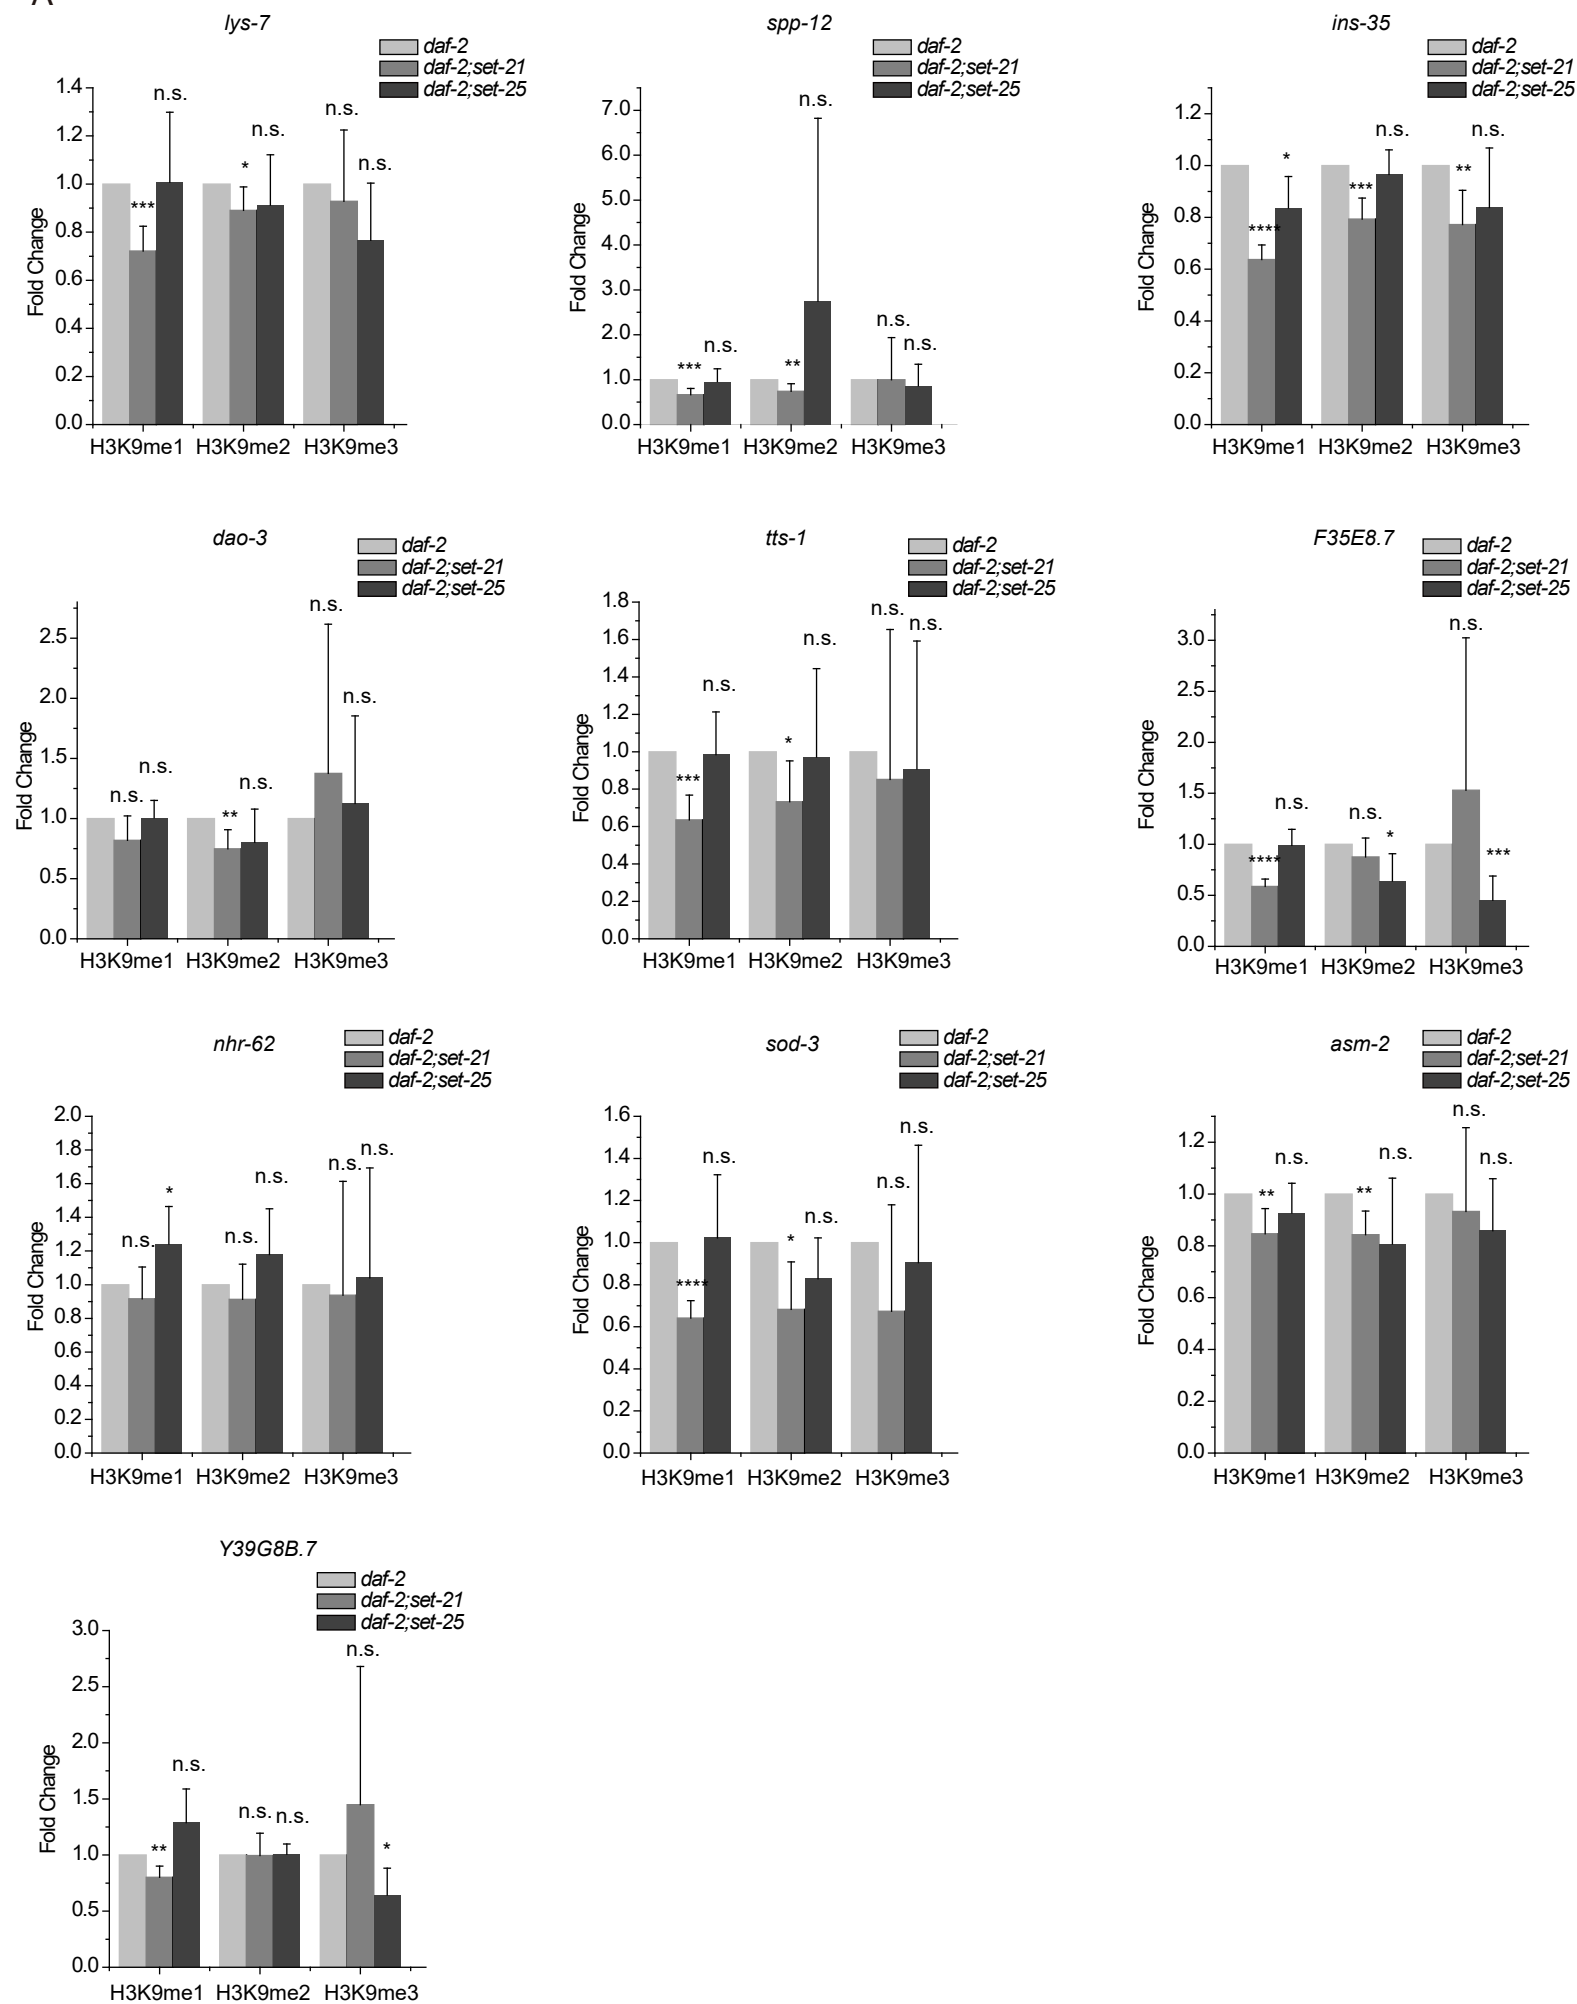

Figure8-S3

Supplement: supp [file elife-74812-supp-v1.zip]

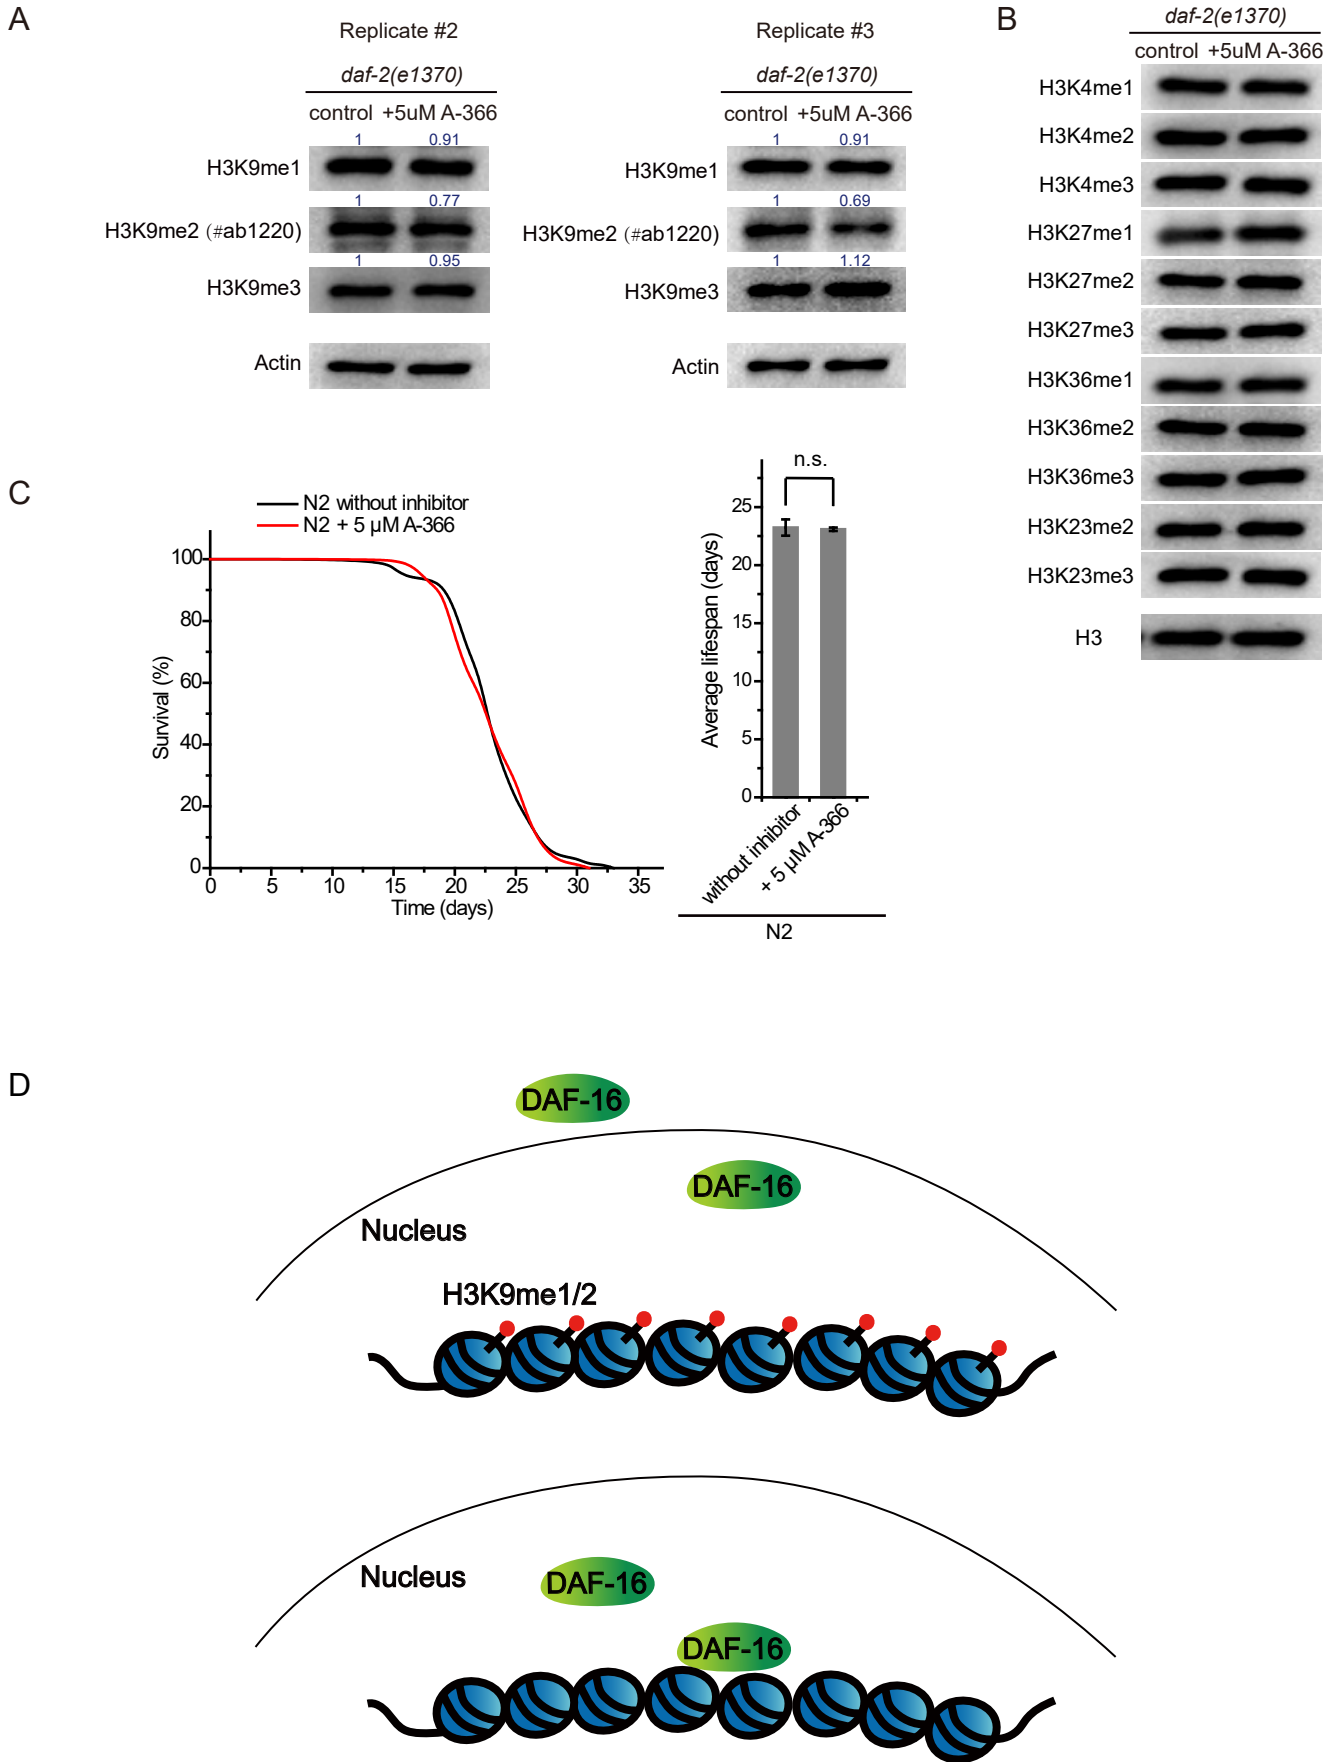

Figure8-S4

Supplement: supp [file elife-74812-supp-v1.zip]

A

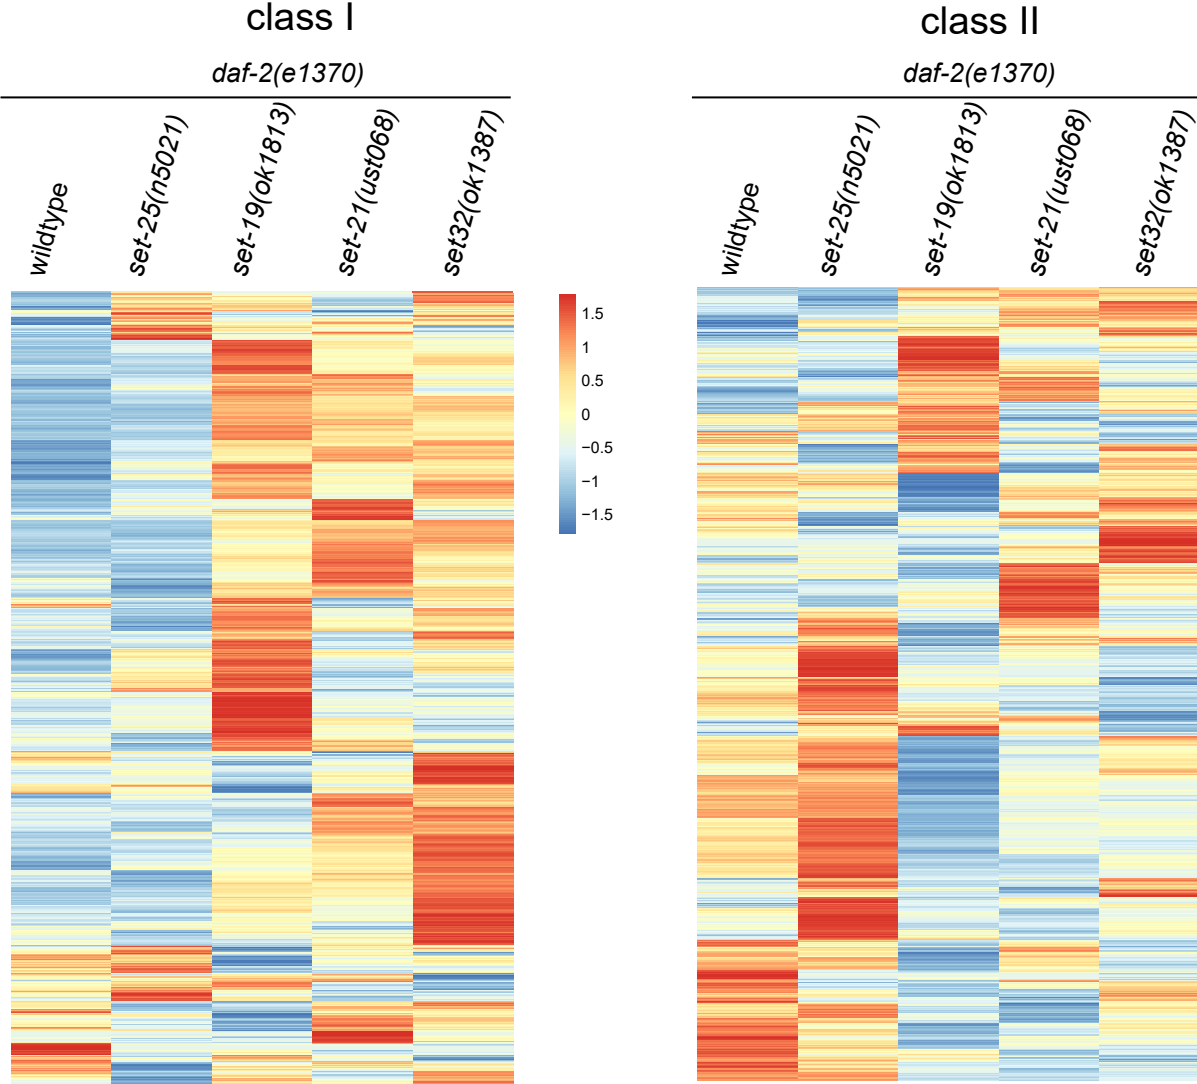

B

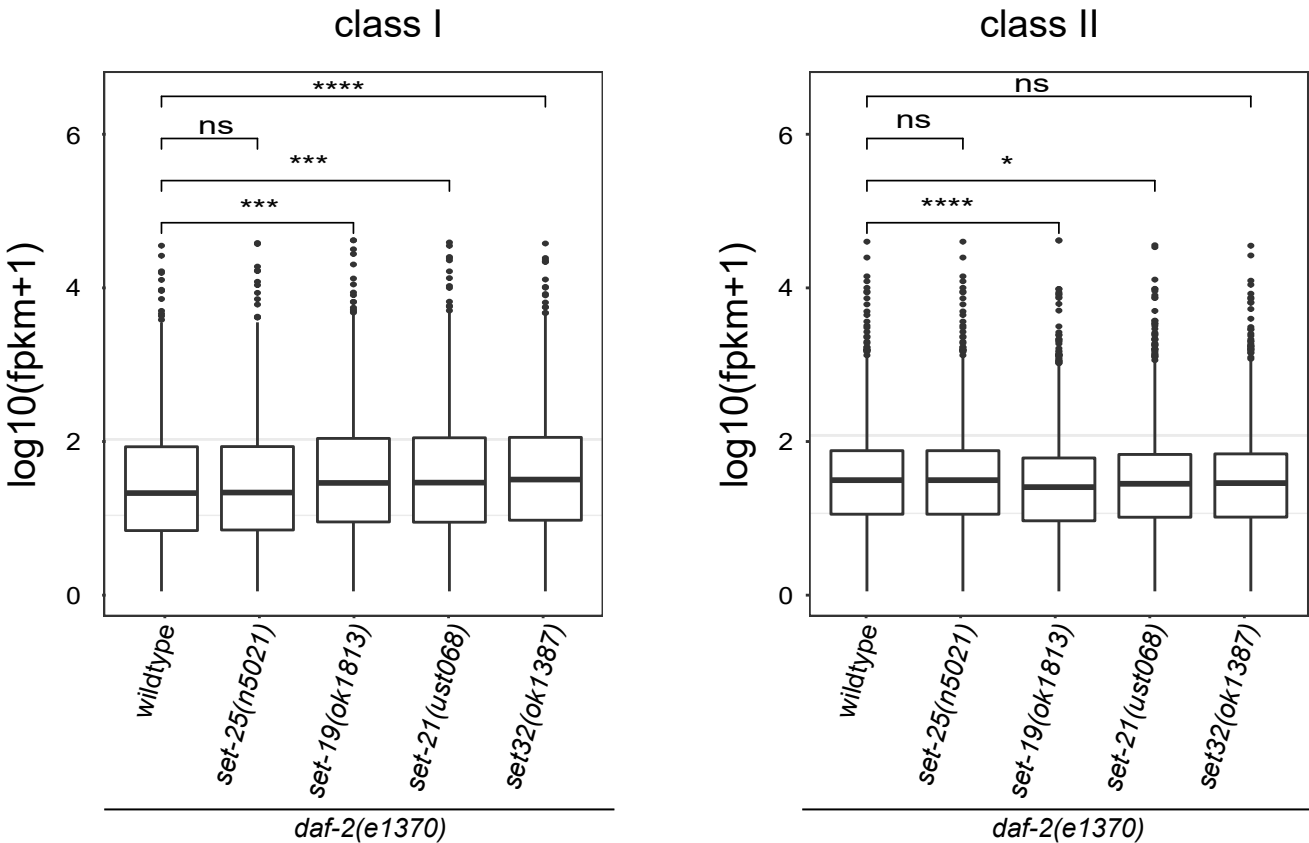

Supplement: supp [file elife-74812-supp-v1.zip]

A

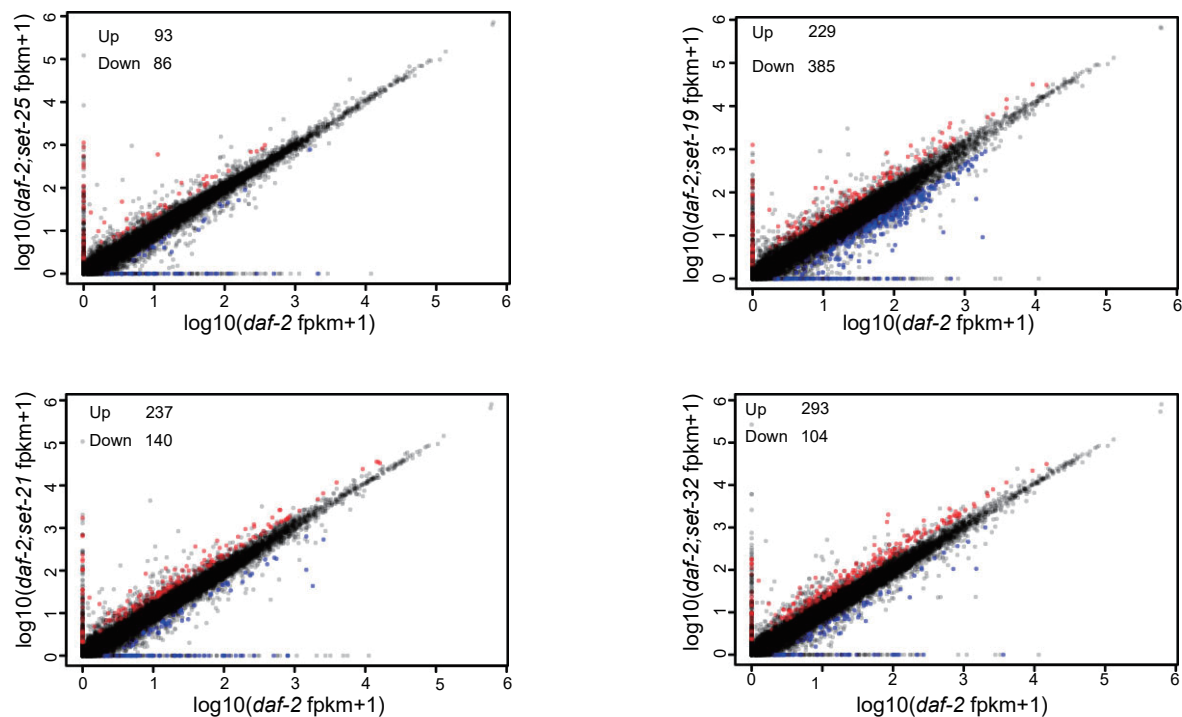

B

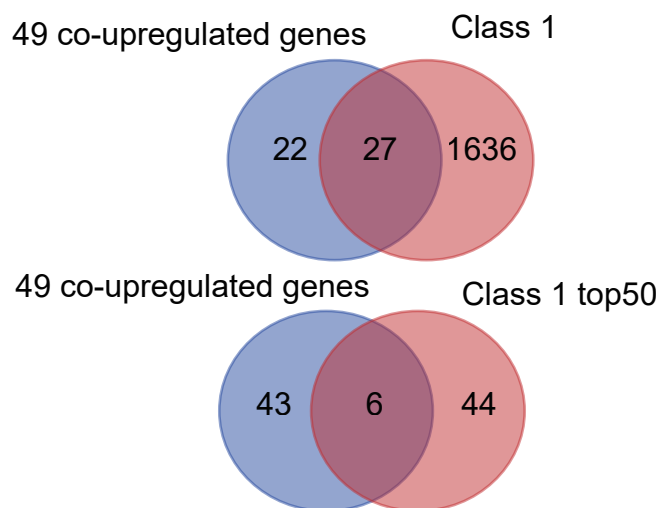

C

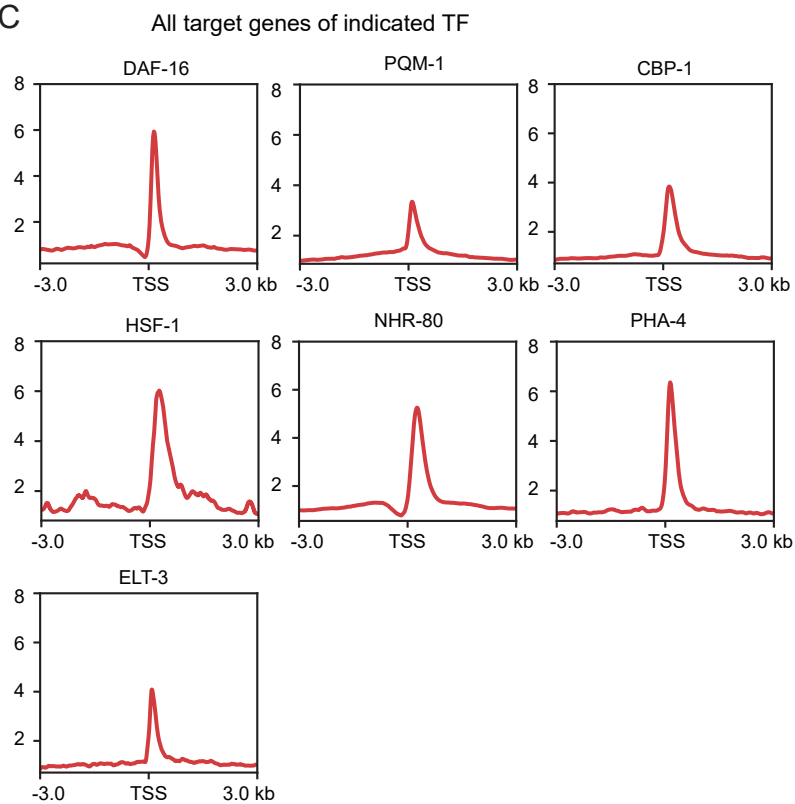

D

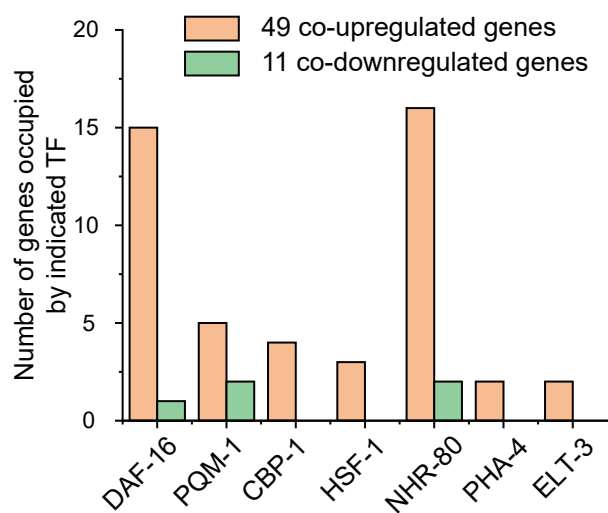

E

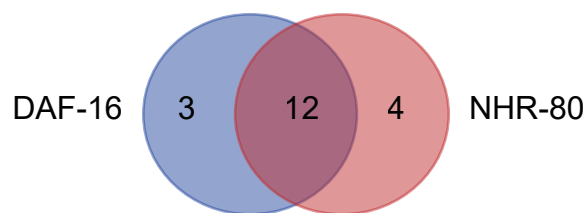

Figure6-S1

Supplement: supp [file elife-74812-supp-v1.zip]

A

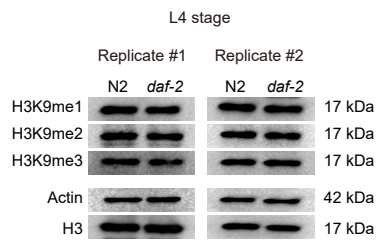

B

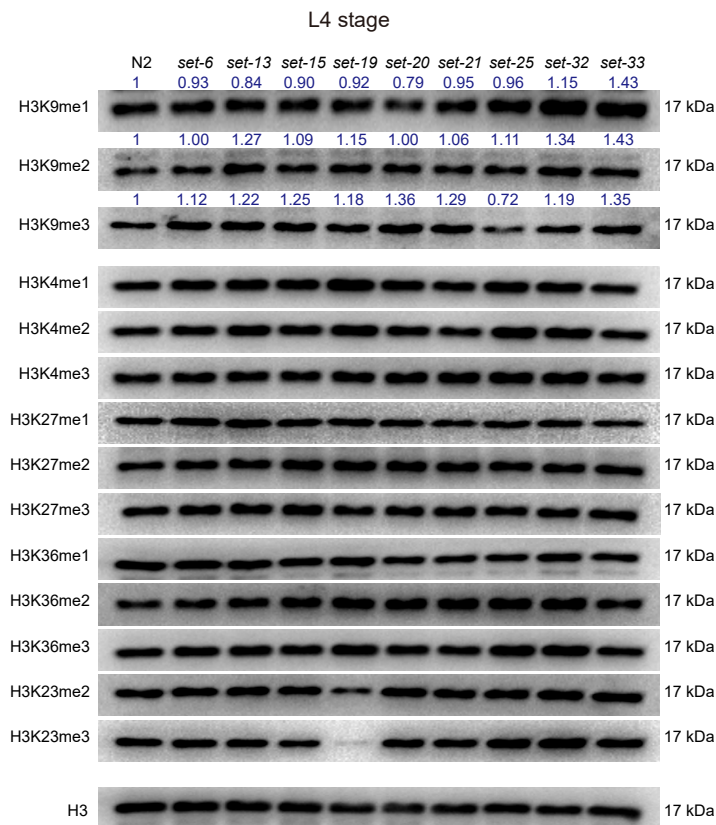

C

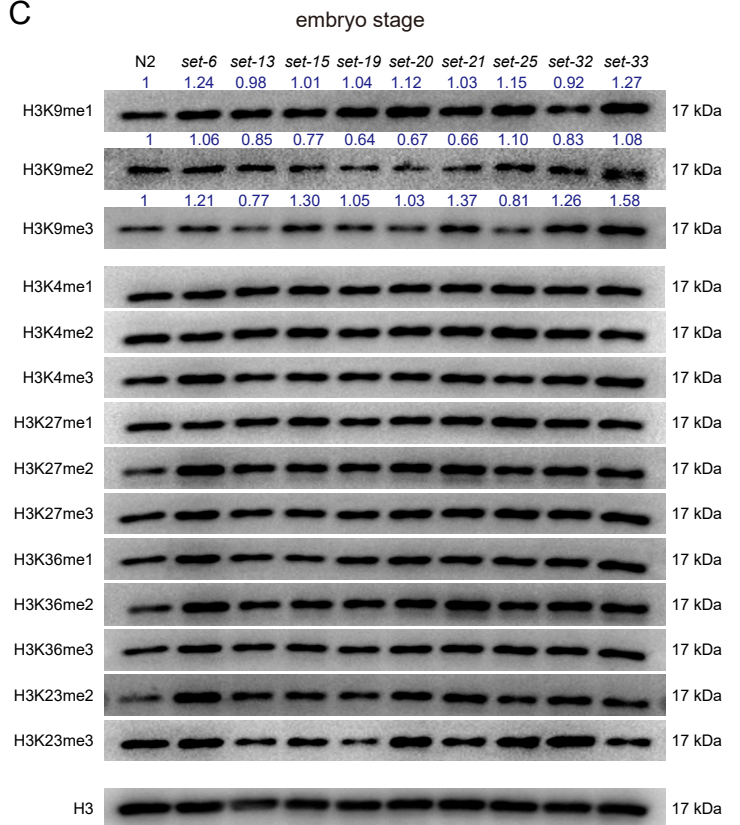

Figure8-S1

Supplement: supp [file elife-74812-supp-v1.zip]

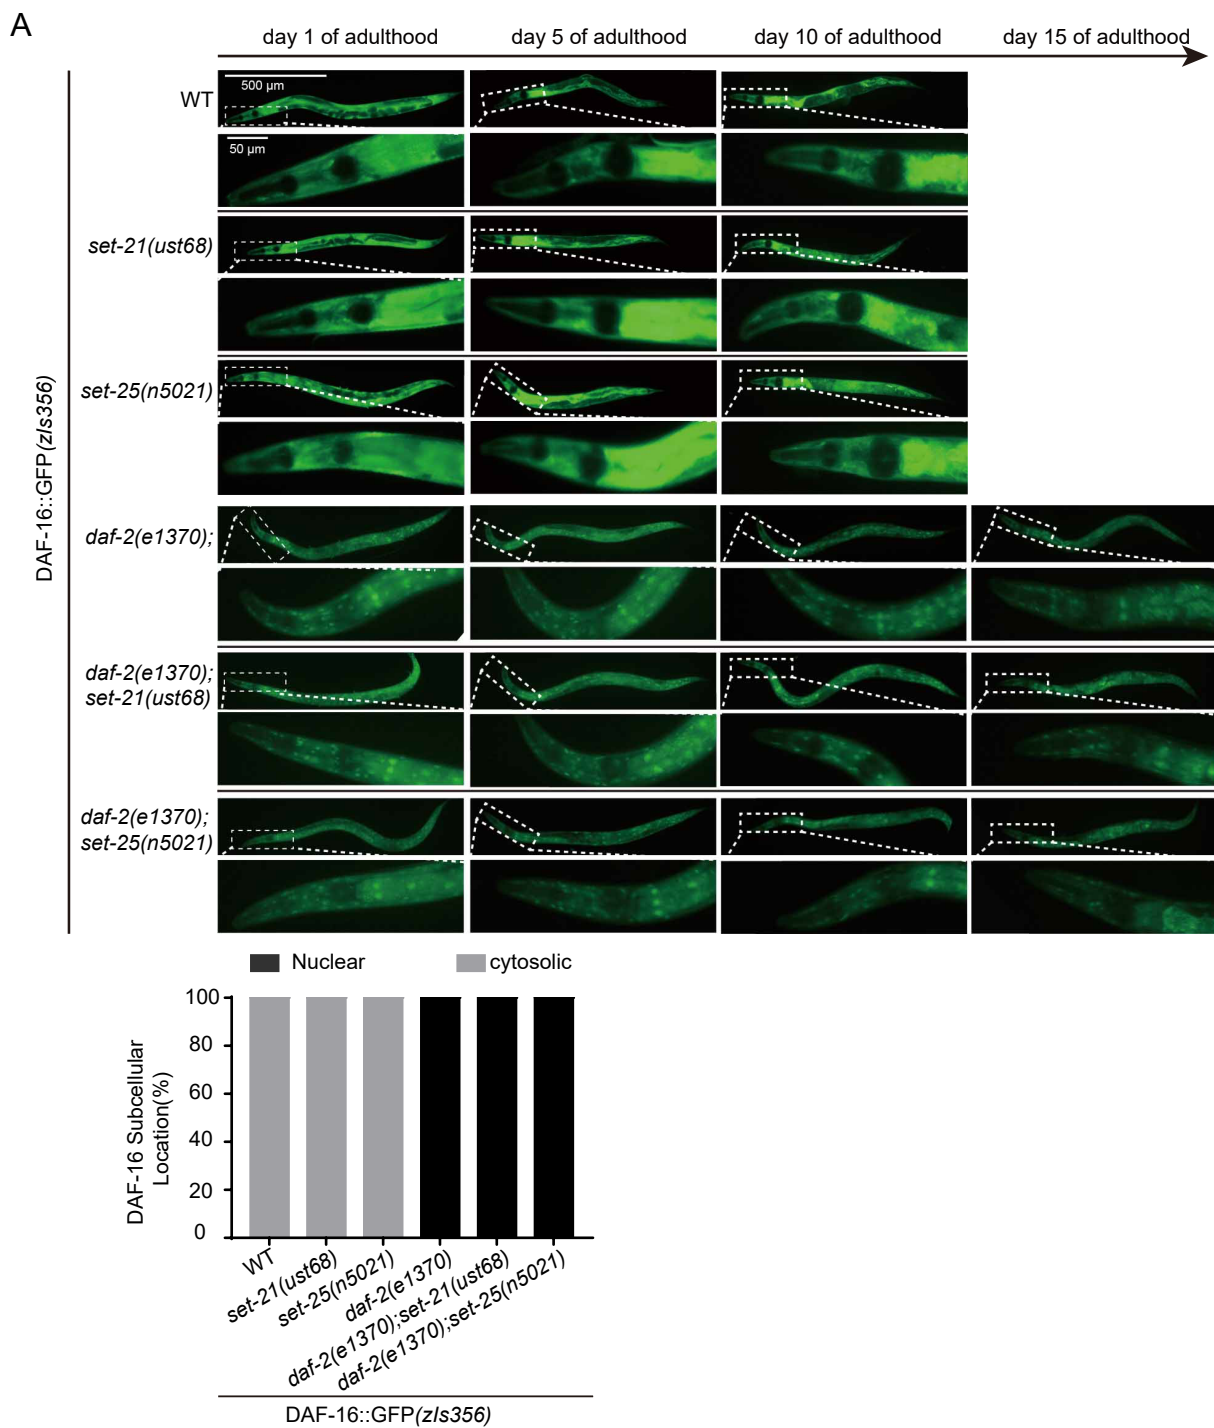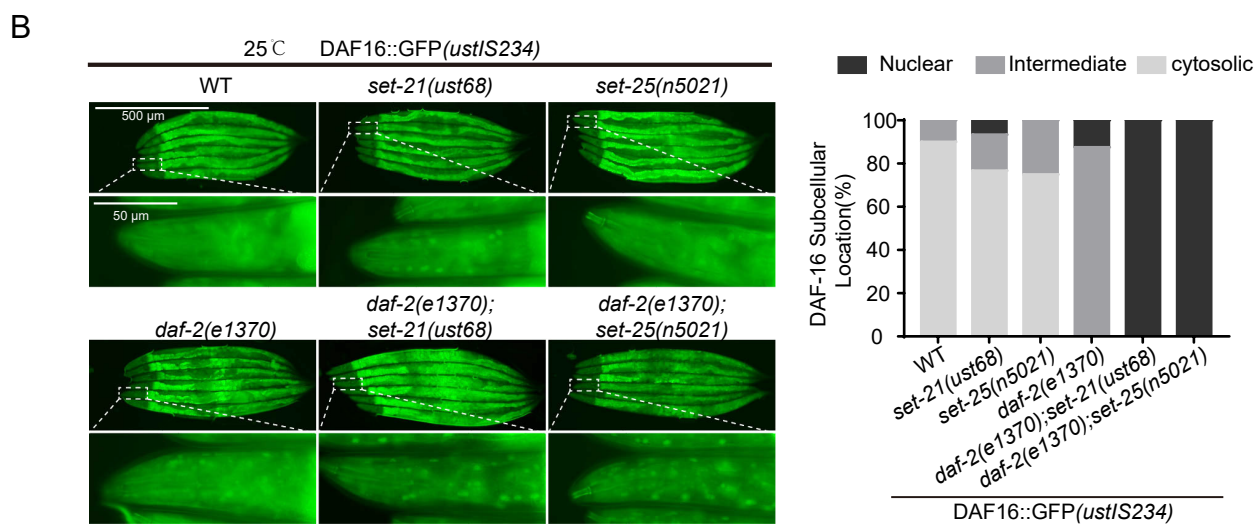

Figure5-S1

Supplement: supp [file elife-74812-supp-v1.zip]

A

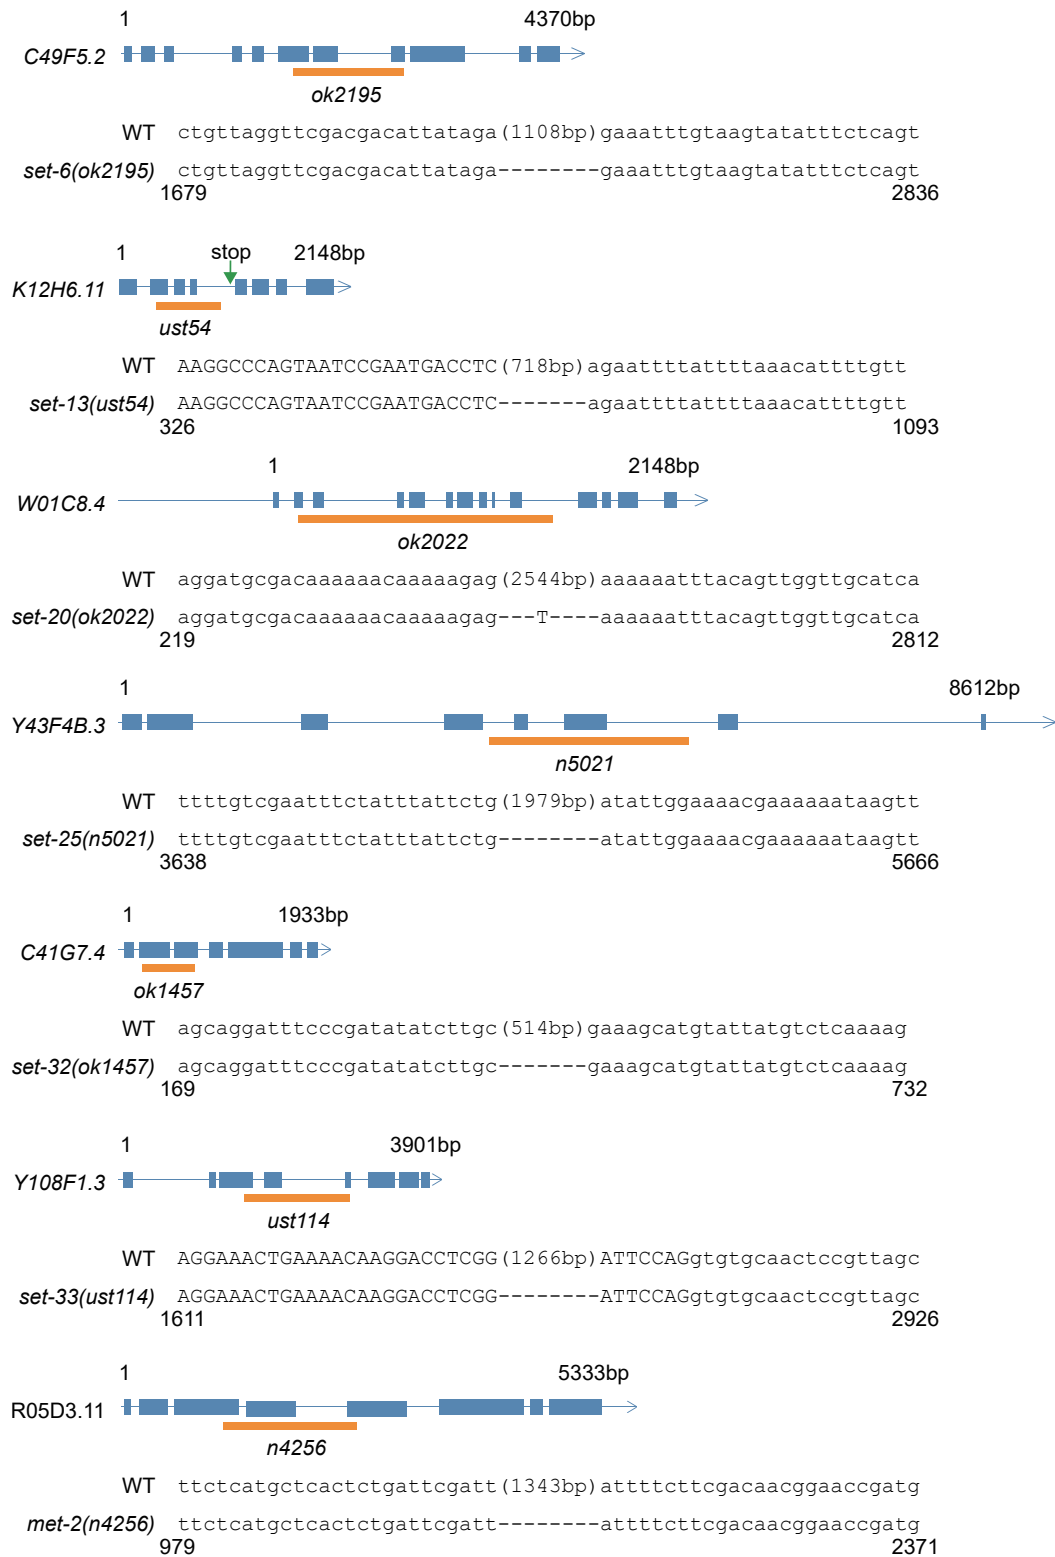

B

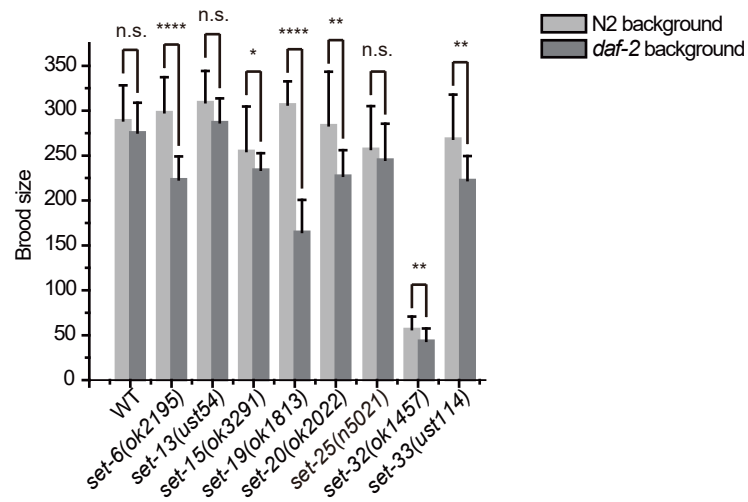

Figure3-S2

Supplement: supp [file elife-74812-supp-v1.zip]

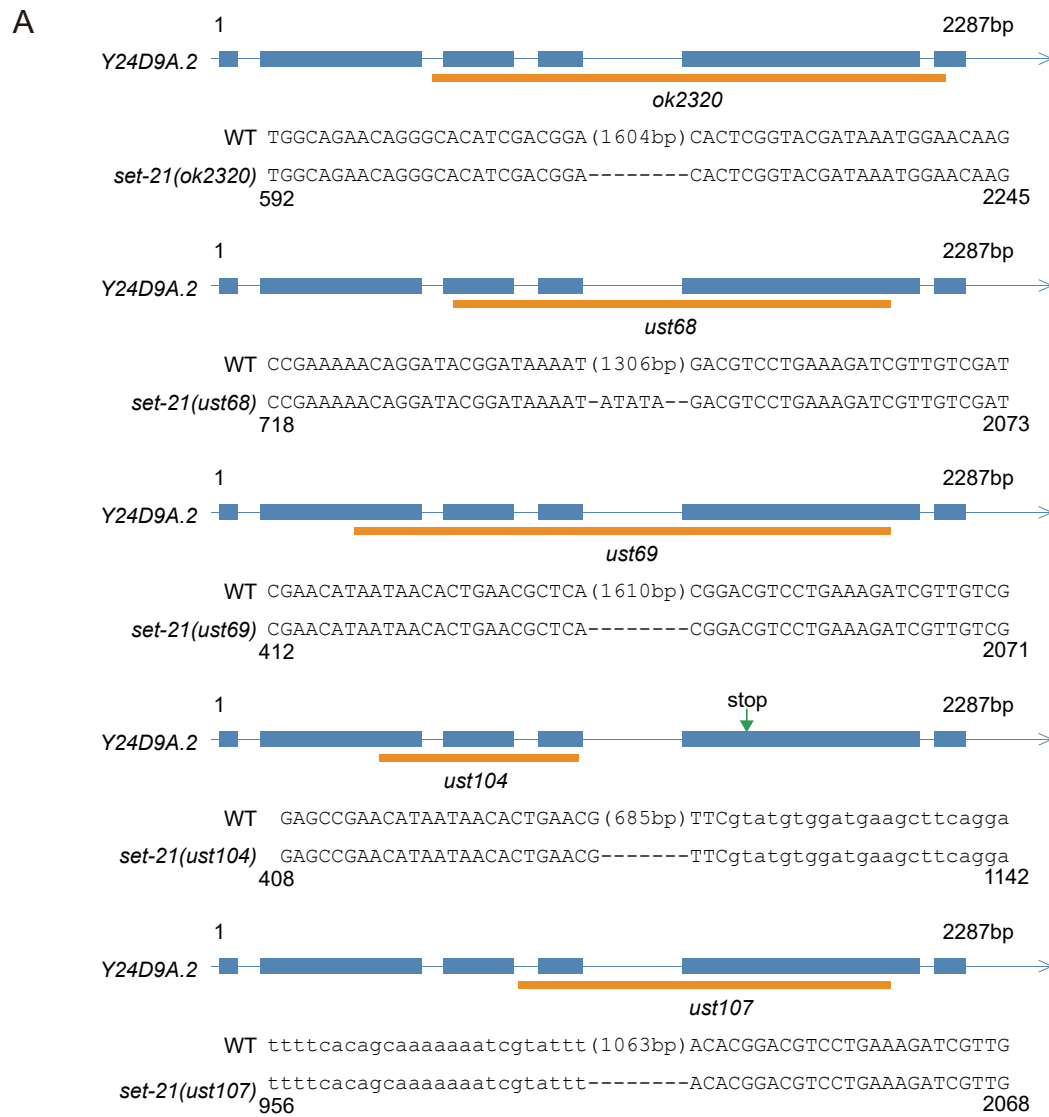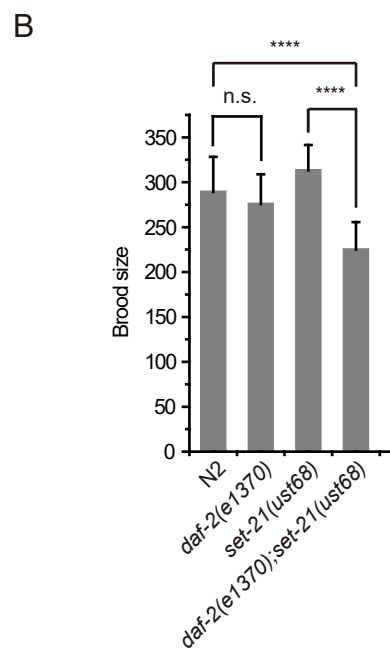

Figure1-S1

Supplement: supp [file elife-74812-supp-v1.zip]

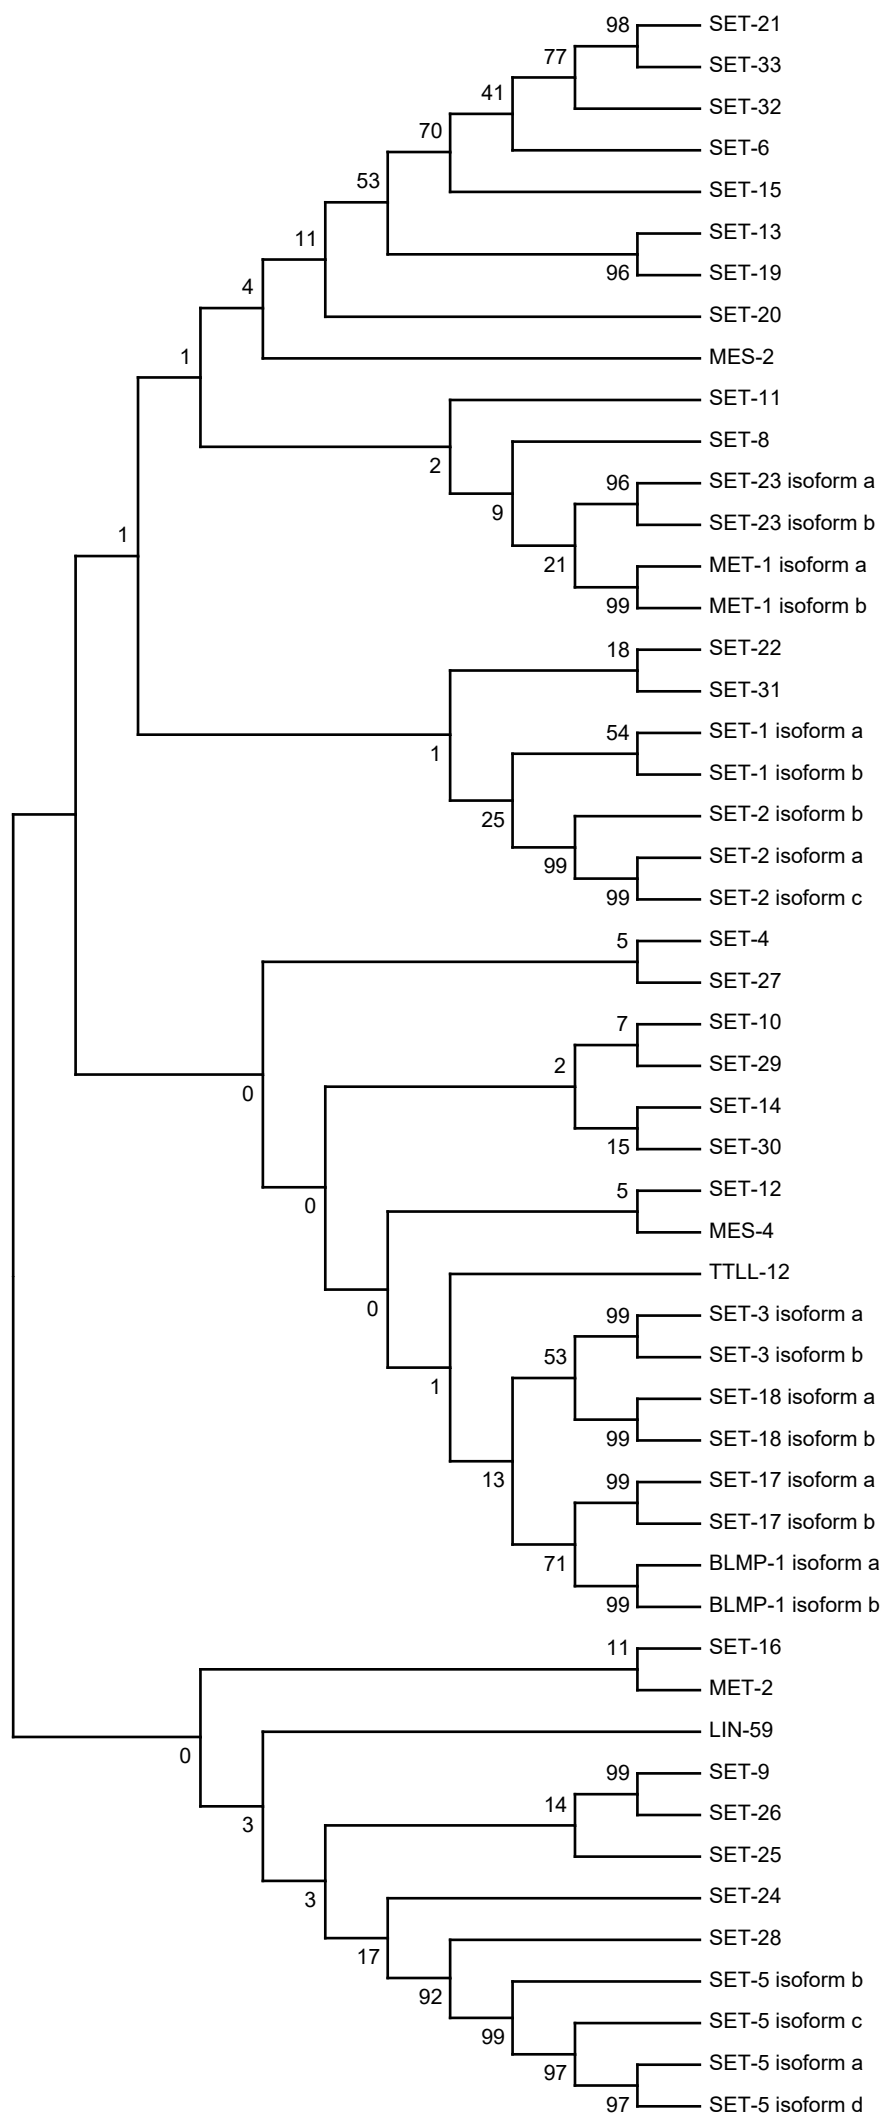

Figure3-S1

Supplement: supp [file elife-74812-supp-v1.zip]

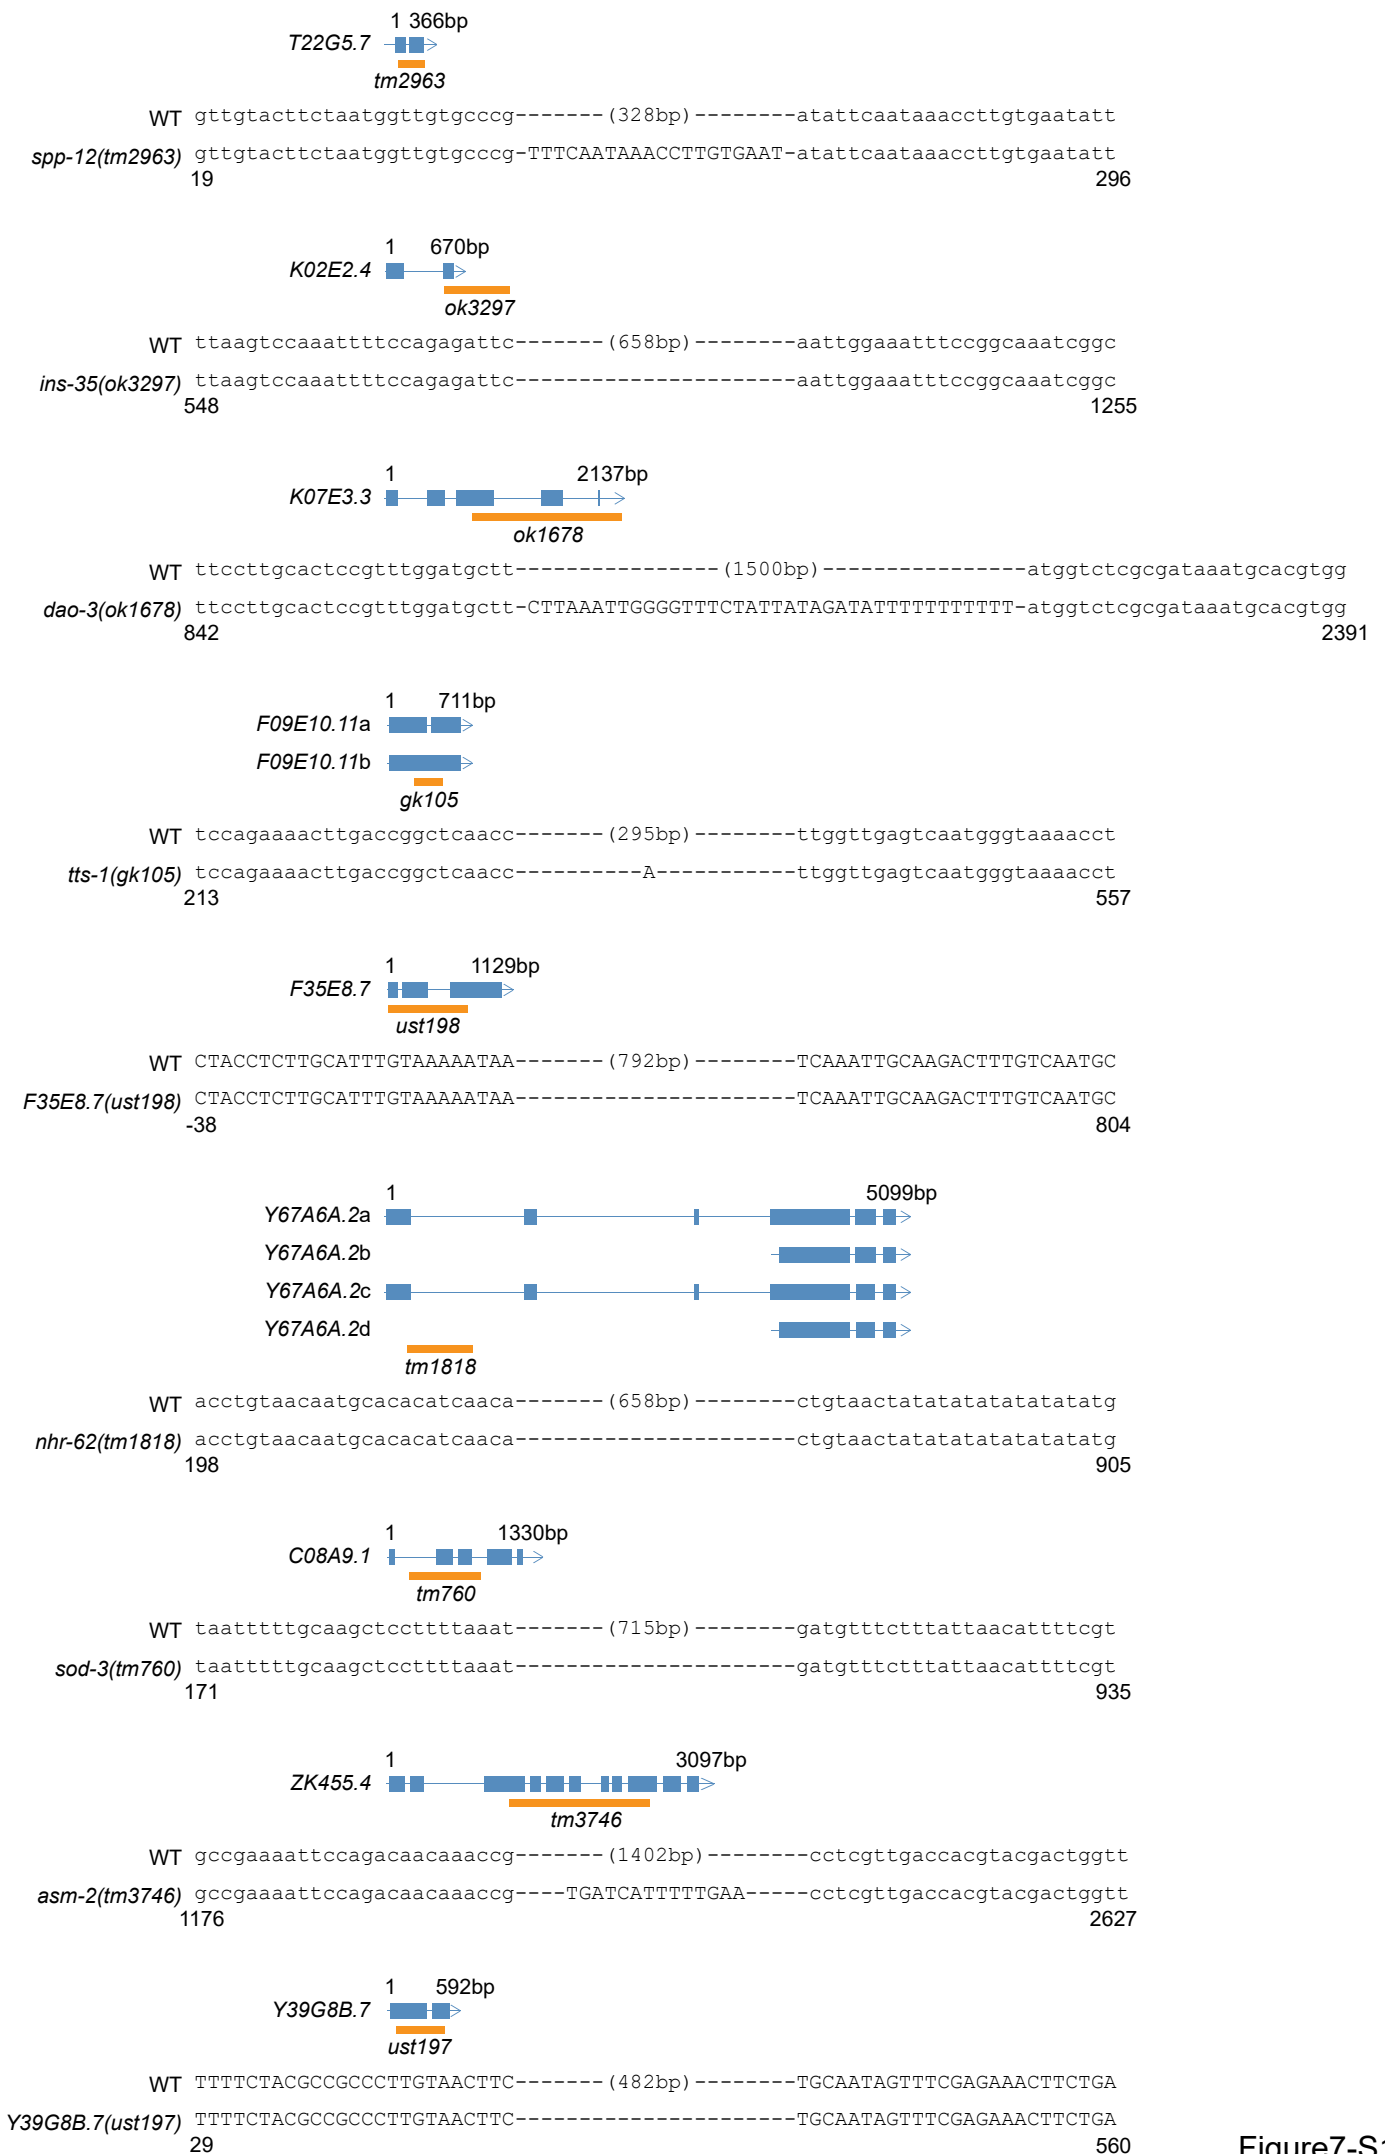

Figure7-S1

Supplement: supp [file elife-74812-supp-v1.zip]
